1 **Unique and distinct identities and functions of leaf phloem cells revealed by single cell transcriptomics**

2

3

4 **Short Title: Transcriptome atlas of the Arabidopsis leaf vasculature**

5

6 **Ji-Yun Kim<sup>1,§</sup>, Efthymia Symeonidi<sup>2</sup>, Tin Yau Pang<sup>3</sup>, Tom Denyer<sup>2</sup>, Diana Weidauer<sup>1</sup>, Margaret**  
7 **Bezruczyk<sup>1</sup>, Manuel Miras<sup>1</sup>, Nora Zöllner<sup>1</sup>, Michael M. Wudick<sup>1</sup>, Martin Lercher<sup>3</sup>, Li-Qing Chen<sup>5</sup>,**  
8 **Marja C.P Timmermans<sup>2</sup> & Wolf B. Frommer<sup>1,4§</sup>**

9

10 <sup>1</sup> Institute for Molecular Physiology and Cluster of Excellence on Plant Sciences (CEPLAS), Heinrich-Heine-  
11 University Düsseldorf, Düsseldorf 40225, Germany

12 <sup>2</sup> Center for Plant Molecular Biology, University of Tübingen, Auf der Morgenstelle 32, 72076 Tübingen,  
13 Germany

14 <sup>3</sup> Institute for Computer Science and Department of Biology, Heinrich-Heine-University Düsseldorf,  
15 Düsseldorf 40225, Germany

16 <sup>4</sup> Institute of Transformative Bio-Molecules (WPI-ITbM), Nagoya University, Chikusa, Nagoya 464-8601,  
17 Japan

18 <sup>5</sup> Department of Plant Biology, School of Integrative Biology, University of Illinois at Urbana-Champaign,  
19 Urbana, Illinois 61801, U.S.A

20

21

22 **ABSTRACT**

23 The leaf vasculature plays a key role in solute translocation. Veins consist of at least seven distinct cell types,  
24 with specific roles in transport, metabolism, and signaling. Little is known about the vascular cells in leaves,  
25 in particular the phloem parenchyma (PP). PP effluxes sucrose into the apoplasm as a basis for phloem  
26 loading; yet PP has only been characterized microscopically. Here, we enriched vascular cells from  
27 Arabidopsis leaves to generate a single-cell transcriptome atlas of leaf vasculature. We identified  $\geq 19$  cell  
28 clusters, encompassing epidermis, guard cells, hydathodes, mesophyll, and all vascular cell types, and used  
29 metabolic pathway analysis to define their roles. Clusters comprising PP cells were enriched for transporters,  
30 including *SWEET11* and *SWEET12* sucrose and UmamiT amino acid efflux carriers. PP development occurs  
31 independently from APL, a transcription factor required for phloem differentiation. PP cells have a unique  
32 pattern of amino acid metabolism activity distinct from companion cells (CC), explaining differential  
33 distribution/metabolism of amino acids in veins. The kinship relation of the vascular clusters is strikingly  
34 similar to the vein morphology, except for a clear separation of CC from the other vascular cells including  
35 PP. In summary, our scRNA-seq analysis provides a wide range of information into the leaf vasculature and  
36 the role and relationship of the leaf cell types.

37

38

39 **KEYWORDS**

40 Arabidopsis, phloem loading, SWEET transporters, sugar transport, amino acid transport, amino acid  
41 metabolism, phloem parenchyma, companion cells.

## 42 INTRODUCTION

43 A key feature of multicellularity is the division of labor. During evolution, when plants moved from aquatic  
44 to the terrestrial environments, new mechanisms were required for the exchange of nutrients - both  
45 photoassimilates from aerial organs to soil-anchored sections, and water and essential nutrients from the soil  
46 to the aerial, photosynthetic organs. Terrestrial plants developed complex vascular systems to provide, for  
47 example, roots with photoassimilates and to provide a photosynthetic organism with essential nutrients. Cells  
48 had to differentiate to acquire unique identities by establishing differential transcriptional networks. The  
49 vasculature serves both transport and communication between organs. Arabidopsis leaf veins are conjoint,  
50 collateral open and closed bundles, with xylem on the abaxial and phloem on the adaxial side<sup>1</sup>. The veins  
51 consist of at least seven different cell types with unique features identifiable by light and electron microscopy.  
52 In Arabidopsis, the abaxial phloem is composed of enucleate sieve elements (SE), as the actual conduits,  
53 which are coupled to companion cells (CC), and a third, poorly understood cell type, the phloem parenchyma  
54 (PP). When mature, the adaxial xylem consists of dead tracheary elements (TE), that are accompanied by  
55 xylem parenchyma (XP). The vascular parenchyma (VP) is often located at the interface between phloem  
56 and xylem. At earlier stages of development, xylem and phloem are separated by meristematic cells  
57 (procambium; open-type vasculature), that differentiate towards the tip of the leaf where procambium is  
58 absent (closed-type)<sup>2</sup>. Phloem and xylem exchange water and solutes in complex ways, and thus the cells  
59 must be equipped with specific sets of transporters. Moreover, it is likely that the different cell types have  
60 specialized metabolic activities. In addition, the vasculature plays important roles in communication by  
61 translocating hormones, small RNAs, and even proteins; and also appear to be involved in electrical  
62 signaling<sup>3</sup>.

63 PP is one of the poorly defined and least characterized vascular cell types. In Arabidopsis, PP has so-called  
64 cell wall ingrowths with a transfer cell appearance that are thought to play a role in amplifying the surface  
65 area to allow for higher transport rates<sup>4,5</sup>. Since in many plant species the interface between CC and SE  
66 (SE/CC) contains only few plasmodesmata, photoassimilate translocation requires an apoplasmic transport

67 route<sup>1</sup>. SE/CC loading is mediated by the H<sup>+</sup>-sucrose symporter SUT1 (named SUC2 in Arabidopsis), which  
68 imports sucrose from the cell wall space<sup>6</sup>. We recently identified sucrose uniporters of the SWEET family in  
69 a specific subset of cells in the phloem, that likely represent PP<sup>7</sup>. SWEET expression in PP was confirmed  
70 using translational GFP fusions, using a new confocal microscopy method that enabled unambiguous PP  
71 identification<sup>8</sup>. A key goal of this work was to characterize the role of PP in more detail by identifying its  
72 mRNA outfit. This could serve, for example, as a basis for identifying transporters involved in phloem  
73 loading of other nutrients, as well as metabolic pathways active in these cells.

74 Understanding the complexity of plant cells at a single cell level has long been an active area of interest in  
75 plant biology. Comprehension at this level is crucial to determine subtle distinctions between, for example,  
76 the multitude of complex vascular cell types. Recently, high throughput single cell RNA-sequencing (scRNA-  
77 seq) has been used to provide new insights into root cell biology and development<sup>9-13</sup>. These latest  
78 technologies have allowed us to build on the resolution of prior atlases derived from the isolation of specific  
79 cell types, using fluorescent activated cell sorting of fluorescently-labelled protoplasts, and/or laser-capture  
80 microdissection<sup>14,10,11</sup>. scRNA-seq allows production of comprehensive data with higher resolution and with  
81 reduced complications and biases associated with the aforementioned techniques. To gain insights into the  
82 specific transcript profiles of the leaf vasculature, we optimized protoplast isolation protocols to enrich for  
83 leaf vascular cells. Using scRNA-seq, we identified unique and characteristic mRNA signatures, which  
84 revealed fundamental differences in amino acid metabolism and transport pathways in PP and CC important  
85 for phloem translocation as well as differences in hormone and glucosinolate metabolism.



## 86 RESULTS

### 87 Enrichment of vascular protoplasts

88 Standard protoplast isolation protocols are efficient for protoplasting mesophyll cells for downstream  
89 applications such as transient expression. However, these procedures do not efficiently release cells from the  
90 vasculature. Here, we developed a methodology for isolating vascular-enriched protoplast populations from  
91 mature Arabidopsis leaves (Fig. 1, Supplementary Fig. 1). Initially, a fraction of the non-vascular cell types  
92 were removed using the ‘tape-sandwich’ method which effectively eliminated trichomes, guard cells, and  
93 epidermis from the abaxial leaf surface (Supplementary Fig. 1b)<sup>15</sup>. Cuts along the midvein further facilitated  
94 access of cell wall digesting enzymes to the vasculature (Fig. 1a, Supplementary Fig. 1b). Elevated  
95 concentrations of mannitol lead to an increased release of protoplasts (Fig. 1b, Supplementary Fig. 1c,d). We  
96 monitored the release by light microscopy, RT-qPCR, and fluorescence microscopy. The mRNA levels of  
97 marker genes were used to evaluate the enrichment of vascular protoplasts during optimization of the  
98 protocols (Fig. 1a-c). In addition, the release of intact vascular protoplasts was verified microscopically by  
99 monitoring fluorescently-labeled cells using stably transformed Arabidopsis lines expressing  
100 *pAtSWEET11:AtSWEET11-GFP*, a tentative marker for PP<sup>7</sup>, and *Q0990*, a procambial marker<sup>16</sup> (Fig. 1d,e,  
101 Supplementary Fig. 1e. The bulk leaf (not subjected to protoplasting) transcriptome showed high correlation  
102 with bulk protoplast transcriptomes (Pearson’s correlation coefficient of 0.9) (Supplementary Fig. 2a,  
103 Supplementary Table 1). The high correlation indicates that the protoplasting protocol used here did not  
104 impact the relative abundance of cells in the leaf and supported the notion that the scRNA-seq data derived  
105 from the protoplasts should cover essentially all cell types present in a mature leaf (the term enriched here  
106 thus refers to enrichment over standard protocols).

### 107 Single cell RNA-sequencing of vascular-enriched leaf protoplast population

108 scRNA-seq libraries were produced from vasculature-enriched leaf protoplast populations, with 5,230 single-  
109 cell transcriptomes obtained from two biological replicates. Sequencing to a depth of ~96,000 reads per cell  
110 was undertaken, and identified a median number of 3,342 genes, and 27,159 unique molecular identifiers

111 (UMIs, representing unique transcripts), per cell (Supplementary Fig. 2b). Unsupervised clustering using  
112 Seurat<sup>17</sup> identified 19 distinct cell clusters (Fig. 2a, Supplementary Video 1, Supplementary Table 2). Plotting  
113 the transcriptomes from the two replicates in two dimensions using Uniform Manifold Approximation and  
114 Projection (UMAP)<sup>18</sup> revealed an overlapping distributions of cells, and a similar proportion of cell identities  
115 (Supplementary Fig. 2c). mRNA profiles and relative cell numbers in the clusters were highly correlated in  
116 the replicates (Supplementary Table 2). To assign cell identity to the clusters, we examined the specificity of  
117 transcripts of known marker genes (Fig. 3, Supplementary Fig. 3, Supplementary Table 3 and 4).

118 The 19 clusters cover all major cell types of the leaf. The population was dominated by mesophyll cells (~75%  
119 of all cells). as indicated by the enrichment of known mesophyll markers (*CAB3*, *LHCB2.1*, and *CAI*)<sup>19,20</sup>  
120 (Fig. 3, Supplementary Fig. 3a). The mesophyll group comprised twelve clusters (Clusters, or C1, 2, 3, 5, 6-  
121 9, 11, 12, 14; Fig. 2a, Fig. 3; Supplementary Table 4) and formed three major branches on the UMAP plot.  
122 Naively, two separate mesophyll clusters can be expected, one for palisade and one for spongy parenchyma.  
123 *FIL (YABI)* transcripts, markers for spongy parenchyma were enriched in C2 and C7, possibly indicating that  
124 these clusters may represent spongy parenchyma (Supplementary Fig. 3a)<sup>21</sup>. Among the mesophyll clusters,  
125 C6 and C9 were enriched for rRNAs (Supplementary Table 4). We did not remove rRNA before sample  
126 preparation and did not filter cells that showed higher rRNA transcript levels since rRNA levels can vary  
127 between cells. Whether C6 and 9 represent unique biologically relevant cell populations in the leaf or are due  
128 to artifacts was not further evaluated. While the mesophyll clusters likely contain interesting information, we  
129 did not characterize them further, as we decided to focus on the vasculature.

130 Beyond the mesophyll, epidermal cells were identified in C13, based on enrichment of the epidermis-specific  
131 transcription factor *AtML1*<sup>22</sup> and wax-related genes (Fig. 3). Epidermal guard cells were found in C16,  
132 indicated by the specific enrichment of *FAMA* and guard cell-specific MAP kinases (Fig. 3, Supplementary  
133 Fig. 3a). Enrichment of transcripts of the purine transporter *PUPI* and the homolog of carrot chitinase, *EP3*,  
134 indicated that C17 comprises hydathodes cells (Supplementary Fig. 3a)<sup>23</sup>.

135 Several clusters showed a vasculature identity, based on the enrichment of known marker genes, indicating  
136 that the enrichment for these cell types was successful. The vasculature is composed of phloem and xylem,  
137 often separated by a meristematic layer, the procambium, which initiates and maintains vascular organization.  
138 We assigned clusters to the seven known cell types present in leaves (Fig. 2). Additionally, we identified cell  
139 types with identities that had properties of two cell types, e.g. xylem and procambium.

140 Cluster 4 was found to contain bundle sheath (BS) and xylem cells and was subsequently subclustered into  
141 three cell populations, C4.1, C4.2, and C4.3 (Fig. 2b, Supplementary Table 5). Subclusters C4.2 and C4.3  
142 were enriched for the BS marker *SCL23*, and the sulfate transporter, *SULTR2;2* (Fig. 2b, Fig. 3,  
143 Supplementary Fig. 3b,c). C4.2 was enriched for genes involved in photosynthetic processes, possibly  
144 indicating a differentiation of BS cells (Supplementary Table 5). The existence of two BS clusters is  
145 consistent with morphological descriptions<sup>24</sup>. C4.1, C10, C15, and C18, with a total of 478 cells, were  
146 assigned as vascular cell types (Fig. 2, Fig. 3, Supplementary Fig. 3a, Supplementary Table 3).

#### 147 **Degree of kinship relations among BS, XP, PC and PP**

148 Clusters composed of BS, xylem parenchyma (XP) and procambial (PC), and PP cells show a J-shaped  
149 relatedness in our UMAP plot (Fig. 2). BS is related to two types of xylem cells (XP1 and XP2), that abut  
150 the PC. PC subclusters into two subsets closely related to XP1 (PC<sup>XP</sup>) and PP1 (PC<sup>PP</sup>), respectively. The PC<sup>PP</sup>  
151 is adjacent to the two PP clusters PP1 and PP2. XP3 and PP2 form a separate group, which together with  
152 XP2, form the hook of the J shape in our UMAP plot (Fig. 2b).

#### 153 **Xylem-related clusters**

154 The enrichment of *GLR3;6*<sup>3</sup> and *ACL5* markers identified C4.1 as parenchymatic xylem cells (Supplementary  
155 Fig. 3a,d-i). Further clustering of C4.1 resulted in two subgroups, XP1 and XP2, distinguished by the relative  
156 enrichment of photosynthetic genes (Supplementary Table 5). An additional subcluster with xylem identity,  
157 XP3, was observed as a subgroup of cells from C18. XP3 was enriched with xylem markers as well as those  
158 for vascular parenchyma<sup>25</sup> (Supplementary Fig. 3d-i, Supplementary Fig. 4). Transport proteins were  
159 enriched in the xylem clusters (XP1-XP3), as one may expect from their role in supplying tracheal elements

160 with ions and nutrients for xylem translocation. These included amino acid transporters, such as the H<sup>+</sup>/amino  
161 acid symporter *AAP6* and the UmamiT amino acid exporter family member *UmamiT22* (refs.<sup>26–28</sup>). The amino  
162 acid export protein *GDU4* was also enriched in the xylem clusters. Multiple SULTR low-affinity sulfate  
163 transporters, which play pivotal roles in sulfate transport in xylem parenchyma cells, were detected in the  
164 xylem cells as well as the boron transporter *NIP6.1*, the glucosinolate importer *GTR2/NPF2.11*<sup>29,30</sup>, the heavy  
165 metal transporter *HMA2*, and the plastidic bile acid transporter *BAT5/BASS5* (Supplementary Table 6).

### 166 **Phloem- and xylem-related subpopulations of the procambial subclusters**

167 *Arabidopsis* procambium constitutes a bifacial stem cell population producing xylem on the adaxial pole and  
168 phloem on the abaxial pole<sup>32,33</sup>. On our UMAP plot, the XP clusters are in proximity to Cluster 10. Cluster  
169 10 could be further subdivided into three subclusters: the PP1 (C10.2) and two distinct procambial  
170 populations, C10.1.1 and C10.1.2 (Fig. 2, Fig. 4a, Supplementary Tables 7 and 8). While cells in PC<sup>PP</sup>  
171 corresponds to procambial cells involved in the maintenance of meristematic identity and the differentiation  
172 of phloem cells, cells of PC<sup>XP</sup> appear to be more closely related to the formation of xylem cells, and is located  
173 closer to the XP clusters (Fig. 4, Supplementary Tables 7 and 8).

174 Cells in the PC<sup>XP</sup> cluster were enriched with transcripts for homeodomain leucine-zipper (HD-Zip)  
175 transcription factor, *HOMEODOMAIN LEUCINE-ZIPPER 8 (HB-8)*<sup>33</sup> transcripts, known to trigger xylem differentiation (Fig.  
176 4b). Adaxial HD-Zip transcription factors, such as *REVOLUTA/INTERFASCICULAR FIBERLESS1*  
177 (*REV/IFL1*), *PHABULOSA (PHB)*, and *CORONA (CNA/AtHB15)*, were also enriched in this cluster (Fig.  
178 4c,d, Supplementary Fig. 5). Conversely, the PC<sup>PP</sup> cluster closest to the PC<sup>XP</sup> was enriched with known factors  
179 involved in the maintenance of protophloem identity and pluripotency, such as *COTYLEDON VASCULAR*  
180 *PATTERN 2 (CVP2)*<sup>34</sup> and *CLAVATA3/EMBRYO SURROUNDING REGION-RELATED 45 (CLE45)*<sup>35,36</sup>  
181 (Fig. 4e-g, Supplementary Fig. 5). *ALTERED PHLOEM DEVELOPMENT (APL)*, a major phloem marker  
182 which inhibits xylem differentiation, was also detected in this region<sup>37</sup> (Fig. 4e). Transcripts related to phloem  
183 differentiation, including *CLE41*, *DOF5.1* and *LBD3* were enriched in the lower region of PC<sup>PP</sup> (Fig. 4h-j,  
184 Supplementary Fig. 5). Strikingly, the arrangement in the UMAP plot, of the PC<sup>PP</sup> cluster facing the PP

185 cluster (C10.2) and the PC<sup>XP</sup> facing the XP clusters, is analogous to the morphological positioning. A detailed  
186 description of the procambium clusters is included in the Supplementary Text.

## 187 **Two phloem parenchyma clusters**

188 SWEET11 and SWEET12 efflux transporters had previously been reported to be expressed in the PP<sup>8,38</sup>.  
189 Sucrose released by the SWEETs into the apoplasm is taken up into the neighboring SE/CC via the sucrose/H<sup>+</sup>  
190 symporter SUC2/SUT1<sup>6,39</sup>. Interestingly, we identified two clusters, C10.2 (PP1) and C18.1 (PP2),  
191 specifically enriched for *SWEET11* and *SWEET12* (Fig. 3, Fig. 5a-f). Cells in the two PP clusters are enriched  
192 for transcripts related to transport processes, reflecting the roles of PP as a critical cell type required for  
193 loading diverse substrates into the phloem (Supplementary Tables 7, 9-11). We identified an additional  
194 member of the Clade III SWEET family, *SWEET13*, in the cells that expressed *SWEET11* and *SWEET12* (Fig.  
195 5g-i). *SWEET13* transcripts show compensatory accumulation in *sweet11;sweet12* double knockout mutants,  
196 indicating redundant roles with SWEET11 and SWEET12<sup>38</sup>. Using a modified protocol from a recently  
197 developed confocal imaging method that enables identification of PP<sup>8</sup>, we were able to validate the presence  
198 of SWEET11 and SWEET13 in the PP-cells in *pSWEET13:SWEET13-YFP* (Fig. 5p) and  
199 *pSWEET11:SWEET11-2A-GFP* lines (Fig. 5q,r).

200 UmamiT family members have been described as cellular exporters for amino acids<sup>40</sup>. We thus speculated  
201 that UmamiTs may play analogous roles for the efflux of amino acids from PP as the SWEETs do for sucrose.  
202 Consistent with our hypothesis, we found *UmamiT18/SIARI* mRNA in PP (Figs 5j-l). Vascular expression in  
203 leaves is supported by *UmamiT18/SIARI* transcriptional fusion lines<sup>40</sup>. In addition, transcripts for six other  
204 members of the UmamiT family (UmamiT12, 17, 20, 21, 28, 30) were enriched in the two PP clusters (Fig,  
205 5m-o, Supplementary Fig. 6a-f, Supplementary Tables 7 and 11). Notably many of the PP-specific *UmamiTs*  
206 were coexpressed with each other as well as *SWEET11* and *12* (Supplementary Fig. 6g, Supplementary Table  
207 12).

208 As many transcripts related to transport processes were specifically enriched in the PP clusters, and many of  
209 them were coregulated (Supplementary Table 12), this may indicate that they are subject to control by the

210 same transcriptional networks. We therefore searched for transcription factors that might be responsible for  
211 coregulation of the functionally related transporters. We identified multiple leucine zipper genes (bZIP) either  
212 specific to the PP clusters (*bZIP6*, *bZIP7*, *bZIP9*), or present in PP and other clusters (*TGA7*, *bZIP11*;  
213 Supplementary Fig. 7). We were able to confirm that *bZIP9* promoter activity was specific for the PP cells in  
214 the leaf vasculature, using a transcriptional fusion, *pbZIP9:GFP-GUS* (Fig. 6a-d). Strong GUS activity was  
215 also detected in cell types known to be involved in apoplasmic transport steps, such as the unloading zones  
216 of anthers and seeds, and the veins of petals, receptacles, ovules, transmitting tract, and funiculi  
217 (Supplementary Fig. 8). The cell specificity of bZIP9 is consistent with a possible role in the activation of  
218 target genes involved in transport process across different tissues. The nature of the separation of PP into two  
219 subclusters will require further analysis.

## 220 **The companion cell cluster**

221 Companion cells, which acquire carbon and nitrogen from the adjacent PP, but also maintain the functionality  
222 of the enucleate sieve elements, cluster separately from all other cell types. C15 was designated as CC based  
223 on the enrichment of transcripts for the sucrose/H<sup>+</sup> symporter *SUC2/SUT1*, the H<sup>+</sup>-ATPase *AHA3*, and genes  
224 such as *FTIP* and *APL* (Fig. 3, Supplementary Fig. 3a). CCs were enriched for transcripts of various  
225 transporters, including the amino acid/H<sup>+</sup> symporter *AAP2* (ref.<sup>41</sup>), the potassium channel *KATI* (ref.<sup>42</sup>), the  
226 hexose uniporters *SWEET1* and *SWEET4* (ref.<sup>43</sup>), and the tonoplast peptide transporter *PTR4/NPF8.4* (ref.<sup>44</sup>)  
227 (Supplementary Table 11). All these markers are also enriched in the CC translome<sup>45</sup>. Notably, many genes  
228 involved in control of flowering were also enriched in CCs (Supplementary Table 3).

## 229 **PP and CC cells undergo differentiation through distinct pathways**

230 The clear separation of PP and CC in the UMAP was striking and indicates the presence of distinct  
231 differentiation pathways. The MYB coiled-coil-type transcription factor APL plays a key role for the  
232 definition of phloem identity<sup>37</sup>. In our dataset, APL was preferentially expressed in CC, but also detected in  
233 the PC<sup>PP</sup> cluster (Fig 4e and Supplementary Fig. 3a). As APL function is necessary for the development of  
234 the SECC complex, one may propose two hypotheses: (i) APL serves as a master regulator of all phloem

235 cells, or (ii) PP develops independently of the SECC differentiation. While *apl* mutants are characterized by  
236 drastic reduction of CC marker *SUC2*<sup>37</sup>, *apl* retains expression of multiple PP markers (Fig. 7b); PP marker  
237 transcripts were even > fourfold higher in the *apl* mutant (Fig. 7a). Whether the increase of PP-marker  
238 transcripts in *apl* is due to a compensatory mechanism in which APL represses PP differentiation, as  
239 suggested for xylem differentiation<sup>37</sup>, remains to be elucidated.

## 240 **Unique and complementary metabolic landscapes of PP and CC**

241 Amino acid transporters of the AAP and UmamiT families are relatively non-selective and transport many of  
242 the proteogenic and other amino acids<sup>28,46</sup>. One may therefore assume that the translocation of most amino  
243 acids is similar and that relative amino acid levels are mainly determined by the relative rates of biosynthesis,  
244 that the amino acids all enter the translocation stream in similar ways and that the relative levels do not change  
245 substantially during translocation. However, labeling studies have shown that amino acids behave very  
246 differently, with some being effectively metabolized along the path of source-to-sink partitioning, while other  
247 stay largely unmetabolized<sup>47</sup>. Surprisingly, the amino acid distribution in stems is also varying for different  
248 amino acids<sup>48</sup>. These phenomena might be explained by differential distribution of metabolic activities in  
249 different vascular cell types. We therefore carried out a pathway activity analysis to define a pathway activity  
250 score (PAS) that quantifies the average expression of the pathway's genes in one cell type relative to the other  
251 cell types<sup>49</sup>. The PAS values of the CC and PP were strikingly different for both amino acid biosynthetic and  
252 degradation pathways (Fig. 8). While the activity of biosynthetic amino acid pathways was low in CC, PP-  
253 containing clusters showed elevated metabolic activity. A comprehensive analysis of pathway activities  
254 across all clusters revealed many other interesting features unique to specific cell types. For instance, the  
255 epidermis cluster (C13) was enriched with biosynthetic activities for wax esters, cuticular wax, the suberin  
256 monomer and very long chain fatty acids. These substances function as coatings in the epidermis, serving as  
257 a moisture barrier and protecting plants from pathogens. The PP-including cluster, C18, showed high activity  
258 of hormone pathways such as ABA, ethylene, JA, and GA, and the BS and XP clusters (C4) and the two PP-  
259 including clusters (C10 and C18) were enriched for glucosinolate biosynthesis activity (Supplementary Text,



260 Supplementary Figs. 9 and 10). C19 may represent so-called S-cells, cell likely involved in defense responses,  
261 based on the enrichment of programmed cell death pathways and PAS values for insect chewing-induced  
262 glucosinolate breakdown<sup>50</sup> (Supplementary Table 13, Supplementary Text). The two PP clusters (C10, C18)  
263 showed high PAS values for callose biosynthesis, consistent with callose deposition in PP transfer cells<sup>51</sup>.  
264 We also provide a PAS analysis across all cell types that is not discussed further here (Supplementary Fig 10,  
265 Supplementary Text).

### 266 **Cell-type specific expression of plasmodesmatal proteins**

267 Plasmodesmata (PD) are highly complex channels that interconnect plant cells, likely transporting solutes,  
268 metabolites, small RNAs and proteins. Different cell types have unique types of plasmodesmata, including  
269 that which connects CC to enucleate sieve elements to supply all components necessary for function. The  
270 PDs typically are branched on the CC side and have a single pore on the sieve element side. We here found  
271 that transcripts of PD genes such as the *PLAMODESMATA-LOCATED PROTEIN (PDLP)*s and *MULTIPLE*  
272 *C2 DOMAINS AND TRNAMEMBRANE REGION PROTEIN (MCTP)*s showed distinct expression patterns  
273 in different cell types (Fig. 9a-d, Supplementary Fig. 11a,b)<sup>52,53</sup>. For example, *PDLP6*, 7, and 8 transcripts  
274 were found in PP and CC, while *PDLP2* and 3 transcripts were present in mesophyll cells (Fig. 9a-d,  
275 Supplementary Fig. 11a). The cell-type specificity of *PDLPs* was correlated with their phylogenetic  
276 relationships (Fig. 9e). Our results are consistent with data from GUS reporter fusions for the *PDLP7* and 8  
277 promoters<sup>54</sup>. *MCTP1* and 3 transcripts were mainly enriched in the vasculature (Supplementary Fig. 11b). In  
278 particular, *MCTP1* transcript was specifically enriched in CC, consistent with a role in trafficking the florigen  
279 protein FLOWERING LOCUS T (FT), from companion cell to sieve elements<sup>55</sup>. In comparison, *MCTP4*,  
280 *MCTP6* and *MCTP15* are ubiquitously expressed in vascular and mesophyll cells (Supplementary Fig. 11b).  
281 Overall, our data supports the concept of PD-type specific assembly of PDs.



## 282 **DISCUSSION**

283 Despite the advances in scRNA-seq technologies, application to plant cells still faces the challenge of  
284 removing cell walls to allow the release of individual cells and the penetration of the buffers into cells. Recent  
285 studies (using Arabidopsis, rice, as well as maize aerial tissues) clearly demonstrate the difficulty of capturing  
286 vascular cell types. For example, a key cell type in the vasculature, the PP, was not identified in any of the  
287 recently published scRNA-seq data from roots<sup>9-13</sup>. Here, we systematically optimized protoplast isolation  
288 protocols to enrich vascular cell types and produced a single cell transcriptome and metabolic activity score  
289 atlas that covers essentially all known cell types in the Arabidopsis leaf. The scRNA-seq confirmed that  
290 except for trichomes, abaxial epidermis and guard cells which were intentionally removed, all known  
291 nucleus-containing cells of the leaf were represented in the dataset. In particular, all cells from the leaf  
292 vasculature were identified.

293 The vascular cells had identities clearly distinct from those of the epidermis, guard cells and mesophyll. The  
294 bundle sheath formed a supercluster, together with all vascular cells including the vascular meristem, except  
295 the companion cells (CC). A major finding within this atlas was that the kinship relation of vascular cells was  
296 highly similar to the actual morphology of the vasculature, with the exception of the CC, which formed a  
297 unique island separate from BS, xylem, procambium and the phloem parenchyma. The arrangement of the  
298 XP-PC<sup>XP</sup>-PC<sup>PP</sup>-PP clusters in the UMAP plot reflected a potential developmental trajectory, in which the  
299 meristematic cells are localized in the center of the cluster and the surrounding cells differentiate and acquire  
300 distinct identities. A future pseudotime trajectory analysis will allow us to better understand the transition  
301 from meristematic cell to differentiated phloem or xylem cells types. Some clusters showed gradients,  
302 indicating a transition, in which transcriptional modules (for example, for xylem identity) decreased in favor  
303 of phloem modules. One example is the PC, in which cells closer to the xylem shared some xylem properties,  
304 while those closer to PP shared PP properties. A similar behavior was seen for the VP. It is conceivable that  
305 the well-studied dorsoventral cues, or cues from neighboring cells, are responsible for these gradients.

306 From their positioning inside the phloem, one may naively have expected the PP and CC to cluster together.

307 CC are unique since they have to fulfil their own tasks, e.g. import sucrose from PP, and at the same time  
308 maintain the function of the adjacent enucleate sieve elements, living cells that act as conduits for assimilate  
309 translocation<sup>56</sup>. Based on this dual role, it is possibly not surprising that they form such a distinct island.  
310 Whether PP and CC derive from a common ancestor remains unclear since the ontogeny of PP is unknown.  
311 The ontogenesis of CC is much better understood<sup>37</sup>. SE/CC mother cells divide asymmetrically to produce  
312 CC and SE. The APL transcription factor is a master regulator for SE/CC development, and a repressor of  
313 xylem identity<sup>37</sup>. Based on our data, it seems unlikely that APL is responsible for driving PP ontogeny but  
314 may implicate alternative pathways for PP differentiation.

315 A major discovery was the assignment of Clusters 10 and 18 as PP, providing first insights into the PP  
316 transcriptome. The PP has essential roles in sucrose transfer to the SE/CC, but also likely many other  
317 functions in transport, metabolism and signaling. Using *SWEET11* and *12* as markers, two distinct clusters  
318 were identified, C10.2 and C18.1. It will require more careful analyses to determine if the two clusters  
319 represent spatially different cells types or developmental trajectories. *SWEET13* is a gene that may act in a  
320 compensatory role, as evidenced by higher mRNA levels in *sweet11;12* mutants. Here we detected *SWEET13*  
321 in the same cells as *SWEET11* and *12* (ref. <sup>38</sup>). Notably, in a parallel study we found that while in main veins  
322 and rank-1 intermediate veins of maize, the orthologs in maize, named *ZmSWEET13a*, *b* and *c*, are likely also  
323 expressed in PP, in the C4 specific rank-2 intermediate veins that are mainly responsible for phloem loading,  
324 the three *ZmSWEET13s* are not in PP, but in two abaxial bundle sheath cells<sup>57</sup>. These data indicated to us that  
325 maize uses a different path for phloem loading of sucrose as compared to for example Arabidopsis or potato<sup>58</sup>.  
326 In addition to the clade III SWEETs, scRNA-seq provided extensive insights into other genes enriched in PP,  
327 in particular identifying transcripts of seven members of the UmamiT amino acid transporter family.  
328 UmamiTs are rather non-selective transporters involved at sites where cellular amino acid efflux is required.  
329 For example, *UmamiT18/SIARI* transcripts, similar to *SWEET11* and *12*, were detected in the chalazal region  
330 of developing seed<sup>40,59</sup>. Knockout mutants showed reduced accumulation of amino acids in seeds, likely due  
331 to both a reduction in efflux from leaves and reduced efflux from the chalaza<sup>40</sup>. Of note, the *SWEETs* and  
332 *UmamiTs* showed high coexpression indices. One may thus hypothesize that the genes share transcriptional

333 control, and thus it will be interesting to analyze whether common transcription factors binding sites are  
334 present in the PP-specific genes. SWEETs and SUTs seem to act as a pair, one responsible for sucrose efflux  
335 from PP, the other for active import into the SE/CC. UmamiTs also seem to act in pairs, with UmamiTs in  
336 PP and AAP amino acid H<sup>+</sup>/symporters<sup>60</sup> including *AAP2*, *4* and *5* in the CC (Supplementary Fig. 14). These  
337 complementary functions are consistent with the clear separation of the clusters in the UMAP plots. A striking  
338 result from the comparison of PP and CC was that their metabolism was also highly differentiated. In  
339 particular, we found major differences regarding amino acid metabolic pathways. Both isotope labeling  
340 studies as well as amino acid localization by 2D-NMR had indicated that amino acids behave very differently  
341 regarding entry into metabolism along the translocation pathway and entry into the phloem<sup>47,48</sup>. This  
342 difference could thus likely be explained by the metabolic activities along the path, rather than their non-  
343 selective transporters.

344 Cell type-specific metabolic pathway analysis revealed many other interesting aspects. For example, hormone  
345 metabolism varied between cell types. Cell types responsible for hormones biosynthesis are largely unknown.  
346 The metabolic analysis provides a map that may guide identification of hormone biosynthesis and transport  
347 pathways in leaves. For instance, high activities of ABA, ethylene, JA, and GA biosynthesis pathways were  
348 detected in C18 (which includes the PP), consistent with the high number ABA, JA, and GA transporters in  
349 the phloem<sup>61-64</sup>. As most transporters show functional redundancy and display diverse substrate specificity,  
350 this dataset serves as a source to identify cell type-specific redundant family members for the generation of  
351 multiple mutants, to eliminate or verify interacting partners, and to identify yet -unknown transporters.

352 Besides the insights into both metabolism and into apoplasmic transport pathways, the study also showed  
353 that cell types with unique types of plasmodesmata express particular paralogs of plasmodesmata-specific  
354 proteins, such as PDLPs or MCTPs. The combined analysis of sym- and apoplasmic fluxes of ions,  
355 metabolites and signaling molecules at the cellular level will likely enable a much better understanding of the  
356 physiology of the leaf.

357 In summary, scRNA-seq enabled us to identify unique and distinct features of the different vascular cell types  
358 present in the leaf. Through transcriptomic and metabolic pathway analyses at the single cell level, we identified  
359 potential roles of PP not only in the transport of sugars, but also in amino acid transport. Importantly, we  
360 also identified unexpected roles of PP in hormone biosynthesis and defense-related responses. The  
361 information provided in this study provides key resources to develop strategies influencing the flux of ions,  
362 metabolites and signals.

363 **METHODS**

364 **Enrichment of vascular protoplasts.** Protoplasts were isolated from mature leaves of 6-weeks-old  
365 *Arabidopsis Col-0* plants grown under short-day (8 h light / 16 h dark) conditions at a PAR of 60  $\mu\text{mol m}^{-2}$   
366  $\text{s}^{-1}$ . For protoplast isolation, the tape-sandwich method<sup>15</sup> was modified and applied for removal of the abaxial  
367 epidermis, guard cells and trichomes. The adaxial side of the fully developed leaves was stabilized by placing  
368 on the time tape, and the abaxial side was adhered to the 3M Magic tape. The abaxial epidermis was removed  
369 by pulling off the 3 M Magic tape. Two cuts were made on each side of the major vein of the peeled leaves  
370 using a razor blade (Swann-Morton, Sheffield). Seven to nine abaxial epidermis-peeled and cut leaves  
371 attached to time tape were immediately immersed in the petri dish containing 15 mL freshly prepared  
372 protoplast isolation solution (1% Cellulase Onuzuka R-10 (Duchefa, Haarlem), 0.3% macerozyme R-10,  
373 (Duchefa, Haarlem), 0.6 M Mannitol, 20 mM MES pH 5.7, 20 mM KCL, 1 mM DTT, 10 mM  $\text{CaCl}_2$ , and  
374 0.1 % BSA). Dithiothreitol (DTT) and bovine serum albumin (BSA) were added to the enzyme solution to  
375 protect the protoplasts. Leaves were shaken at 30 rpm on a platform shaker for 2 hours. The release of the  
376 protoplasts was monitored every 30 min by checking released cells under the microscope or by monitoring  
377 what was left on the time tape. After confirming the release of the protoplasts into the solution, 10 mL of  
378 wash buffer (0.6 M Mannitol, 20 mM MES pH 5.7, 20 mM KCl, 1 mM DTT, 10 mM  $\text{CaCl}_2$ , and 0.1 % BSA)  
379 was slowly added to the petri dish containing the protoplasts. The solution was filtered into a round bottom  
380 20 mL tube using a 70  $\mu\text{m}$  pore size filter (Corning, New York). The protoplast solution was centrifuged at  
381 100 x g for 3 min in a swinging rotor. The protoplasts were washed four times with 20 mL washing buffer.  
382 After the final wash step, protoplasts were slowly resuspended in 1 mL wash buffer and gently filtered twice  
383 using a 40  $\mu\text{m}$  Flowmi cell strainer (Bel-Art SP Scienceware, New Jersey). The number of protoplasts was  
384 counted with the C-Chip Neubauer improved hemocytometer (NanoEnTek, Seoul) under a light microscope  
385 (Leica VT1000, Wetzlar). The viability of protoplasts was determined using trypan blue solution (Gibco;  
386 Thermo Fisher Scientific, Massachusetts).

387 **Quantitative reverse transcription (RT-qPCR).** Total RNA was extracted using the RNeasy Kit (Qiagen,  
388 Hilden). cDNA synthesis and gDNA removal steps were performed using QuantiTect Reverse Transcription  
389 Kit (Qiagen, Hilden), qPCR was performed on Stratagene Mx3000P (Agilent Technologies, California) using  
390 the Lightcycler 480 SYBR Green I Master Mix (Roche, Penzberg). Transcript levels were quantified using  
391 the relative standard curve method. Values were normalized to the level of the internal control, *UBQ10*.  
392 Primers used for RT-qPCR are listed in Supplementary Table 15. For RT-qPCR of *apl* mutants, segregating  
393 seeds from heterozygous parents were sown on MS media. RNA was extracted using 2-weeks-old plants  
394 grown under LD conditions.

395 **Single cell RNA-seq library preparation and sequencing.** Two biological replicates were performed with  
396 the aim of capturing ~7,000 leaf protoplasts for each replicate. Freshly isolated protoplasts were adjusted to  
397 700-900 cells/ $\mu$ L and loaded into the 10X Genomics Chromium single cell microfluidics device according to  
398 the Single Cell 3' Reagent Kit v2 protocol (10x Genomics, California). Eleven cycles were used for cDNA  
399 amplification and 12 cycles were used for final PCR amplification of the adapter-ligated libraries. The quality  
400 and size of the final library was verified on a DNA High Sensitivity Bioanalyzer Chip (Agilent Technologies,  
401 California), and libraries were quantified using the NEBNext Library Quantification Kit for Illumina (New  
402 England Biolabs, Massachusetts). scRNA-seq library sequencing was performed on a NextSeq platform  
403 (Illumina Inc, California), using the sequencing parameters 26,8,0,98 (c.ATG, Tübingen).

404 **Generation of single cell expression matrices.** Reads were aligned to the *Arabidopsis thaliana* reference  
405 genome (Araport 11) using Cell Ranger 3.0.2 (10X Genomics, California) with default parameters. The  
406 output files for the two replicates were aggregated into one gene-cell expression matrix using Cell Ranger  
407 aggregate with the mapped read depth normalization option.

408 **Dimensionality reduction, UMAP visualization, cell clustering analysis, and correlation analysis.** The  
409 Seurat R package (version 3.1.0)<sup>17,65</sup> was used for dimensionality reduction analysis. The SCTransform  
410 option was used for normalization, scaling the data and finding variable genes using default parameters<sup>66</sup>.  
411 During normalization, potential variation due to mitochondrial mapping percentage was removed. We did

412 not remove rRNA before sample preparation and did not filter cells with higher rRNA transcript levels, since  
413 rRNA levels can vary among cells. Fifty principal components (PCs) were selected as input for a graph-based  
414 approach to cluster cells by cell type using a resolution value of 0.8 in all clustering analyses. Uniform  
415 Manifold Approximation and Projection (UMAP) dimensional reduction<sup>18</sup> was used for two-dimensional  
416 visualization using ten PCs, 30 neighboring points and a minimum distance of 0.1. Subclustering was  
417 performed using the same parameters. For the correlation analysis between single cell replicates across  
418 individual clusters, the average expression of cells within a cluster was calculated and the Pearson-correlation  
419 coefficient was determined.

420 **Identification of Differentially Expressed Genes and Cluster-Specific Marker Genes.** Genes  
421 differentially expressed across clusters or subclusters were identified by comparing average transcript levels  
422 in cells of a given cluster to that of cells in all other clusters using the Seurat package likelihood ratio test  
423 (Bimod). The following cutoffs were applied: average expression difference  $\geq 0.25$  natural Log and  $q < 0.01$ .  
424 Cluster-specific marker genes were selected from among the differentially expressed genes based on the  
425 criteria that marker genes must be expressed in  $>10\%$  of cells within the cluster (PCT1), and  $<10\%$  of cells  
426 across all other clusters (PCT2).

427 **Bulk RNA-seq library preparation and sequencing.** Total RNA was extracted from leaves (not  
428 protoplasted) and leaf protoplasts isolated using the same method for the single cell sequencing using the  
429 RNeasy Kit (Qiagen, Hilden). On column DNase treatment was performed to remove residual gDNA using  
430 the RNase-free DNase kit (Qiagen, Hilden) following manufacturer recommendations. Two biological  
431 replicates were made for leaf and leaf protoplast samples. The integrity of the RNA was confirmed using  
432 Agilent RNA 6000 Nano Chip (Agilent Technologies, California) and LabChip GX (PerkinElmer,  
433 Massachusetts). RNA concentration was measured using the Qubit Fluorometer using the RNA broad range  
434 quantification kit (Thermo Fisher, Massachusetts). For mRNA poly-A enrichment, 5  $\mu\text{g}$  of total RNA was  
435 purified using the Poly(A) mRNA Magnetic Isolation Module (New England Biolabs, Massachusetts).  
436 Libraries were constructed using the ULTRA II directional library kit (New England Biolab, Massachusetts),

437 and size selection was done using SPRI beads (New England Biolab, Massachusetts) following the  
438 manufacturer manual with the following exceptions: 7 min of fragmentation time and 26.5 and 10  $\mu$ L SPRI  
439 beads pre-PCR were used to enrich  $\sim$ 400 bp inserts. Library amplification included 10 PCR cycles, and 0.7  
440 volumes of (35  $\mu$ L) of SPRI beads were used for post-PCR purification. QC-tested libraries (Agilent  
441 Technologies, California) were sequenced on an Illumina HiSeq 2500 lane with 150 bp paired-end (Novogene,  
442 Beijing).

443 **Bulk RNA-seq analysis.** Paired-end reads (150 bp) were aligned to the *Arabidopsis thaliana* reference  
444 genome (Araport11) using STAR<sup>67</sup> (maximum intron length of 2 kbp). Differential expression analysis was  
445 carried out in R (v3.6.1) using Bioconductor (v3.9) and DESeq2 (v1.24) (absolute Log<sub>2</sub>FC  $\geq$  1 and q value  
446  $<$  0.05). For correlation analysis of gene expression between protoplasted and non protoplasted bulk tissues,  
447 the Log<sub>2</sub> (mean FPKM+1) expression values were calculated for each gene. Pearson-correlation coefficient  
448 was determined in R.

449 **Pathway activities in different cell types.** We followed the formulation introduced in Xiao *et al.*<sup>49</sup> to  
450 calculate a pathway activity score, which depends on the mRNA level of its constituent genes. The mRNA  
451 count of gene  $i$  in cell  $k$  was denoted as  $g_{i,k}$ . We first normalized the mRNA count of a gene in a cell by the  
452 average for all genes in the cell, and denoted this normalized level as  $g'_{i,k}$ . The mean transcript level  $E_{i,j}$  of  
453 gene  $i$  in cell type  $j$  is then defined as the mean  $g'_{i,k}$  over all cells of that type,  $E_{i,j} = \frac{1}{n_j} \sum_{k=1}^{n_j} g'_{i,k}$ , where  $n_j$  is  
454 the number of cells classified as cell type  $j$ , and  $k$  is the index for individual cells.  $E_{i,j}$  is normalized by the  
455 average transcript level of gene  $i$  across all cell types to become the relative transcript level  $r_{i,j}$  of gene  $i$  in  
456 cell type  $j$ :  $r_{i,j} = E_{i,j} / \left( \frac{1}{N} \sum_{a=1}^N E_{i,a} \right)$ , where  $N$  is the total number of cell types. The pathway activity score  
457 (PAS) of pathway  $t$  in cell type  $j$ , denoted as  $p_{t,j}$ , is then a weighted average of the relative transcript levels  
458 across the pathway genes:  $p_{t,j} = \frac{\sum_{i=1}^{m_t} w_i r_{i,j}}{\sum_{i=1}^{m_t} w_i}$ ; here,  $m_t$  is the number of genes in pathway  $t$ , and the weight  $w_i$   
459 of gene  $i$  is defined as the reciprocal of the number of pathways that include gene  $i$ , to ensure a stronger  
460 influence of pathway-specific genes. As the relative mRNA levels  $r_{i,j}$  are centered around 1, the same is true



461 for the pathway activity  $p_{t,j}$ , with  $p_{t,j} < 1$  corresponding to underrepresentation of pathway  $t$  in cell type  $j$   
462 relative to the pathway's activity across all cell types; conversely,  $p_{t,j} > 1$  indicates a higher than average  
463 activity in cell type  $j$ . To assess the statistical significance of a  $p_{t,j}$  value, we performed a permutation test,  
464 shuffling the cell type labels of the genes a thousand times to simulate the null distribution of  $p_{t,j}$  under the  
465 assumption of no systematic cell type specific pathway activity; we defined an empirical  $p$ -value by  
466 comparing  $p_{t,j}$  to this null distribution. AraCyc pathway lists<sup>68</sup> used for the analysis can be found in  
467 Supplementary Table 14.

468 **Generation of reporter lines.** For the generation of *pbZIP9:GFP-GUS* lines, a 2,289 bp fragment of the  
469 *bZIP9* gene promoter was amplified using bZIP9pro attB1 and bZIP9pro attB2 primers using Col-0 genomic  
470 DNA as template. The corresponding PCR fragment was purified and used for GATEWAY BP reaction into  
471 pDONR221 and cloned into the destination vector pBGWFS7,0 through LR reaction. For generating  
472 *pSWEET11:SWEET11-2A-GFP-GUS* lines, a 4,784 fragment consisting of promoter and SWEET11 genomic  
473 region including all exons and introns was amplified using SWEET11-2A-attB1 and SWEET11-2A-attB2  
474 primers. The SWEET11-2A-attB2 reverse primer contained the 2A cleavage sequence. The genomic  
475 SWEET11 with the 2A cleavage site was cloned into pDONR221 and subcloned into the pBGWFS7,0 vector  
476 through LR reaction. To generate *pSWEET13:SWEET13-YFP*, a 3,941 bp fragment including SWEET13  
477 promoter and its genomic region was amplified using SWEET13attB1 and SWEET13attB2 primers and  
478 cloned into the donor vector pDONR221-f1 by BP reaction. Subsequently, the fragment was sub-cloned into  
479 a gateway-compatible vector, pEG-TW1<sup>69</sup> to generate pSWEET13:SWEET13-YFP construct by LR reaction.  
480 Transformation of plants was performed using the floral dip method<sup>70</sup>. Primers used for amplification are  
481 listed in Supplementary Table 15.

482  
483 **GUS histochemistry.** GUS staining was performed as described with minor modifications<sup>71</sup>. Tissues were  
484 fixed with 90% ice-cold acetone. After applying vacuum for 10 min, acetone was removed and replaced by  
485 prestaining solution (1 mM EDTA, 5 mM potassium ferricyanide, 5 mM potassium ferrocyanide, 100 mM

486 sodium phosphate (pH 7.0), 1% Triton-X-100). After 10 min vacuum, the prestaining solution was replaced  
487 with staining solution containing 1 mM EDTA, 5 mM potassium ferricyanide, 5 mM potassium ferrocyanide,  
488 100 mM sodium phosphate (pH 7.0), 1% Triton-X-100, and 2 mM X-Gluc and further vacuum infiltrated for  
489 15 min in the dark. The tissues in staining solutions containing X-Gluc were incubated at 37 °C in the dark  
490 for 4 hours. Ethanol series were performed from 25% to 70% ethanol in 30 min steps.

491 **Sample preparation for imaging leaf vasculature.** Rosette leaves were excised by cutting the leaf petiole  
492 from 5 weeks old plants grown under SD conditions. Double-sided tape was used to attach the petiole and  
493 the upper lamina of the leaf on the slide glass (abaxial side facing upward, as in the tape-sandwich method).  
494 The abaxial epidermis was peeled using the 3M Magic tape and immediately covered with water. The region  
495 of interest was excised with a razor blade and moved to a new slide glass. Samples were applied with FM4-  
496 64FX (Sigma-Aldrich, Missouri) (5 µg/ml) for 5 min for staining the cell membrane and imaged immediately.  
497 PP-cells were identified based on the cell size and chloroplast organization as described<sup>8</sup>.

498 **Confocal imaging.** Fluorescence images were captured using a Leica TCS SP8 confocal microscope with a  
499 20x or 40x objective with water immersion. GFP, YFP, FM4-64FX, and chlorophyll autofluorescence signals  
500 were acquired using the following settings: GFP, excitation 488 nm (white-light laser) and emission 492-552  
501 nm; YFP, excitation 514 nm and emission 510-565 nm; FM4-64FX, excitation 561 nm and emission 599–  
502 680 nm; chlorophyll autofluorescence, excitation 638 nm and emission 645-738 nm.

503 **Reporting Summary.** Further information on research design is available in the Nature Research Reporting  
504 Summary linked to this article.

505 **Data availability**

506 The raw data that support the findings of this study are available from the corresponding author upon  
507 reasonable request. All sequencing data have been deposited in the Gene Expression Omnibus GEO  
508 ([www.ncbi.nlm.nih.gov/geo/](http://www.ncbi.nlm.nih.gov/geo/)) under the accession number GEO X and The Single Cell Expression Atlas at  
509 EMBL-EBI ([www.ebi.ac.uk/gxa/sc/home](http://www.ebi.ac.uk/gxa/sc/home)).

510 **REFERENCES**

- 511 1. Haritatos, E., Medville, R. & Turgeon, R. Minor vein structure and sugar transport in *Arabidopsis*  
512 *thaliana*. *Planta* **211**, 105–11 (2000).
- 513 2. Kang, J. & Dengler, N. Vein pattern development in adult leaves of *Arabidopsis thaliana*. *Int. J. Plant*  
514 *Sci.* **165**, 231–242 (2004).
- 515 3. Nguyen, C. T., Kurenda, A., Stolz, S., Chételat, A. & Farmer, E. E. Identification of cell populations  
516 necessary for leaf-to-leaf electrical signaling in a wounded plant. *Proc Natl Acad Sci USA* **115**, 10178  
517 (2018).
- 518 4. Arun Chinnappa, K. S., Nguyen, T. T. S., Hou, J., Wu, Y. & McCurdy, D. W. Phloem parenchyma  
519 transfer cells in *Arabidopsis* - an experimental system to identify transcriptional regulators of wall  
520 ingrowth formation. *Front Plant Sci* **4**, 102 (2013).
- 521 5. Edwards, J. *et al.* GIGANTEA is a component of a regulatory pathway determining wall ingrowth  
522 deposition in phloem parenchyma transfer cells of *Arabidopsis thaliana*. *Plant J.* **63**, 651–661 (2010).
- 523 6. Riesmeier, J. W., Willmitzer, L. & Frommer, W. B. Evidence for an essential role of the sucrose  
524 transporter in phloem loading and assimilate partitioning. *EMBO J.* **13**, 1–7 (1994).
- 525 7. Chen, L. Q. *et al.* Sucrose efflux mediated by SWEET proteins as a key step for phloem transport. *Science*  
526 **335**, 207 (2012).
- 527 8. Cayla, T., Le Hir, R. & Dinant, S. Live-cell imaging of fluorescently tagged phloem proteins with  
528 confocal microscopy. *Methods Mol. Biol.* **2014**, 95–108 (2019).
- 529 9. Denyer, T. *et al.* Spatiotemporal developmental trajectories in the *Arabidopsis* root revealed using high-  
530 throughput single-cell RNA sequencing. *Dev. Cell* **48**, 840-852.e5 (2019).
- 531 10. Ryu, K. H., Huang, L., Kang, H. M. & Schiefelbein, J. Single-cell RNA sequencing resolves molecular  
532 relationships among individual plant cells. *Plant Physiol.* **179**, 1444–1456 (2019).

- 533 11. Zhang, T.-Q., Xu, Z.-G., Shang, G.-D. & Wang, J.-W. A single-cell RNA sequencing profiles the  
534 developmental landscape of Arabidopsis root. *Mol Plant* **12**, 648–660 (2019).
- 535 12. Shulse, C. N. *et al.* High-throughput single-cell transcriptome profiling of plant cell types. *Cell Rep.* **27**,  
536 2241-2247.e4 (2019).
- 537 13. Jean-Baptiste, K. *et al.* Dynamics of Gene Expression in Single Root Cells of Arabidopsis thaliana. *Plant*  
538 *Cell* **31**, 993 (2019).
- 539 14. Birnbaum, K. *et al.* A gene expression map of the *Arabidopsis* root. *Science* **302**, 1956–60 (2003).
- 540 15. Wu, F.-H. *et al.* Tape-*Arabidopsis* Sandwich - a simpler *Arabidopsis* protoplast isolation method. *Plant*  
541 *Meth.* **5**, 16 (2009).
- 542 16. Radoeva, T., ten Hove, C. A., Saiga, S. & Weijers, D. Molecular characterization of *Arabidopsis*  
543 GAL4/UAS enhancer trap lines identifies novel cell-type-specific promoters. *Plant Physiol.* **171**, 1169  
544 (2016).
- 545 17. Satija, R., Farrell, J. A., Gennert, D., Schier, A. F. & Regev, A. Spatial reconstruction of single-cell gene  
546 expression data. *Nat. Biotech.* **33**, 495–502 (2015).
- 547 18. McInnes, L., Healy, J. & Melville, J. UMAP: uniform manifold approximation and projection for  
548 dimension reduction. *arXiv eprint arXiv:1802.03426*, (2018).
- 549 19. Sawchuk, M. G., Donner, T. J., Head, P. & Scarpella, E. Unique and overlapping expression patterns  
550 among members of photosynthesis-associated nuclear gene families in *Arabidopsis*. *Plant Physiol.* **148**,  
551 1908 (2008).
- 552 20. Endo, M., Shimizu, H., Nohales, M. A., Araki, T. & Kay, S. A. Tissue-specific clocks in *Arabidopsis*  
553 show asymmetric coupling. *Nature* **515**, 419–422 (2014).
- 554 21. Uemoto, K., Araki, T. & Endo, M. Isolation of Arabidopsis palisade and spongy mesophyll cells.  
555 *Methods Mol. Biol.* **1830**, 141–148 (2018).

- 556 22. Takada, S., Takada, N. & Yoshida, A. *ATML1* promotes epidermal cell differentiation in *Arabidopsis*  
557 shoots. *Development* **140**, 1919 (2013).
- 558 23. Bürkle, L. *et al.* Transport of cytokinins mediated by purine transporters of the PUP family expressed in  
559 phloem, hydathodes, and pollen of *Arabidopsis*. *Plant J.* **34**, 13–26 (2003).
- 560 24. Haritatos, E., Medville, R. & Turgeon, R. Minor vein structure and sugar transport in *Arabidopsis*  
561 *thaliana*. *Planta* **211**, 105–111 (2000).
- 562 25. Endo, A. *et al.* Drought induction of *Arabidopsis* 9-cis-epoxycarotenoid dioxygenase occurs in vascular  
563 parenchyma cells. *Plant Physiol* **147**, 1984–1993 (2008).
- 564 26. Pilot, G. *et al.* Overexpression of GLUTAMINE DUMPER1 leads to hypersecretion of glutamine from  
565 hydathodes of *Arabidopsis* leaves. *Plant Cell* **16**, 1827–40 (2004).
- 566 27. Okumoto, S. *et al.* High affinity amino acid transporters specifically expressed in xylem parenchyma and  
567 developing seeds of *Arabidopsis*. *Journal of Biological Chemistry* **277**, 45338–45346 (2002).
- 568 28. Dinkeloo, K., Boyd, S. & Pilot, G. Update on amino acid transporter functions and on possible amino  
569 acid sensing mechanisms in plants. *Sem Cell Dev Biol* **74**, 105–113 (2018).
- 570 29. Madsen, S. R., Olsen, C. E., Nour-Eldin, H. H. & Halkier, B. A. Elucidating the role of transport  
571 processes in leaf glucosinolate distribution. *Plant Physiol.* **166**, 1450 (2014).
- 572 30. Nour-Eldin, H. H. *et al.* NRT/PTR transporters are essential for translocation of glucosinolate defence  
573 compounds to seeds. *Nature* **488**, 531–534 (2012).
- 574 31. Sanchez, P., Nehlin, L. & Greb, T. From thin to thick: major transitions during stem development. *Trends*  
575 *Plant Sci* **17**, 113–121 (2012).
- 576 32. Elo, A., Immanen, J., Nieminen, K. & Helariutta, Y. Stem cell function during plant vascular  
577 development. *Sem. Cell Dev. Biol.* **20**, 1097–1106 (2009).

- 578 33. Baima, S. *et al.* The *Arabidopsis* ATHB-8 HD-zip protein acts as a differentiation-promoting  
579 transcription factor of the vascular meristems. *Plant Physiol* **126**, 643–655 (2001).
- 580 34. Rodriguez-Villalon, A., Gujas, B., van Wijk, R., Munnik, T. & Hardtke, C. S. Primary root protophloem  
581 differentiation requires balanced phosphatidylinositol-4,5-biphosphate levels and systemically affects  
582 root branching. *Development* **142**, 1437 (2015).
- 583 35. Gujas, B. *et al.* A reservoir of pluripotent phloem cells safeguards the linear developmental trajectory of  
584 protophloem sieve elements. *Curr. Biol.* **30**, 755-766.e4 (2020).
- 585 36. Rodriguez-Villalon, A. *et al.* Molecular genetic framework for protophloem formation. *Proc Natl Acad*  
586 *Sci USA* **111**, 11551 (2014).
- 587 37. Bonke, M., Thitamadee, S., Mähönen, A. P., Hauser, M.-T. & Helariutta, Y. APL regulates vascular  
588 tissue identity in *Arabidopsis*. *Nature* **426**, 181–186 (2003).
- 589 38. Chen, L. Q. *et al.* Sucrose efflux mediated by SWEET proteins as a key step for phloem transport. *Science*  
590 **335**, 207–11 (2012).
- 591 39. Gottwald, J. R., Krysan, P. J., Young, J. C., Evert, R. F. & Sussman, M. R. Genetic evidence for the *in*  
592 *planta* role of phloem-specific plasma membrane sucrose transporters. *Proc Natl Acad Sci USA* **97**,  
593 13979 (2000).
- 594 40. Ladwig, F. *et al.* Siliques are Red1 from *Arabidopsis* acts as a bidirectional amino acid transporter that  
595 is crucial for the amino acid homeostasis of siliques. *Plant Physiol.* **158**, 1643–55 (2012).
- 596 41. Zhang, L. *et al.* Altered xylem-phloem transfer of amino acids affects metabolism and leads to increased  
597 seed yield and oil content in *Arabidopsis*. *Plant Cell* **22**, 3603–3620 (2010).
- 598 42. Schachtman, D. P., Schroeder, J. I., Lucas, W. J., Anderson, J. A. & Gaber, R. F. Expression of an inward-  
599 rectifying potassium channel by the *Arabidopsis* KAT1 cDNA. *Science* **258**, 1654–1658 (1992).
- 600 43. Chen, L. Q. *et al.* Sugar transporters for intercellular exchange and nutrition of pathogens. *Nature* **468**,  
601 527–532 (2010).

- 602 44. Weichert, A. *et al.* AtPTR4 and AtPTR6 are differentially expressed, tonoplast-localized members of the  
603 peptide transporter/nitrate transporter 1 (PTR/NRT1) family. *Planta* **235**, 311–323 (2012).
- 604 45. Mustroph, A. *et al.* Profiling translomes of discrete cell populations resolves altered cellular priorities  
605 during hypoxia in Arabidopsis. *Proc Natl Acad Sci USA* **106**, 18843–8 (2009).
- 606 46. Fischer, W. N., Kwart, M., Hummel, S. & Frommer, W. B. Substrate specificity and expression profile  
607 of amino acid transporters (AAPs) in Arabidopsis. *Journal of Biological Chemistry* **270**, 16315–16320  
608 (1995).
- 609 47. Atkins, C. A. Biochemical aspects of assimilate transfers along the phloem path: N-solutes in lupins.  
610 *Austr. J. Plant Physiol.* **27**, 531–537 (2000).
- 611 48. Metzler, A. *et al.* Plant histochemistry by correlation peak imaging. *Proc. Natl. Acad. Sci. USA* **92**,  
612 11912–5 (1995).
- 613 49. Xiao, Z., Dai, Z. & Locasale, J. W. Metabolic landscape of the tumor microenvironment at single cell  
614 resolution. *Nature Communications* **10**, 3763 (2019).
- 615 50. Koroleva, O. A., Gibson, T. M., Cramer, R. & Stain, C. Glucosinolate-accumulating S-cells in  
616 *Arabidopsis* leaves and flower stalks undergo programmed cell death at early stages of differentiation.  
617 *Plant J.* **64**, 456–469 (2010).
- 618 51. Maeda, H., Song, W., Sage, T. & DellaPenna, D. Role of callose synthases in transfer cell wall  
619 development in tocopherol deficient Arabidopsis mutants. *Frontiers in Plant Science* **5**, 46 (2014).
- 620 52. Lee, J.-Y. *et al.* A plasmodesmata-localized protein mediates crosstalk between cell-to-cell  
621 communication and innate immunity in Arabidopsis. *Plant Cell* **23**, 3353–3373 (2011).
- 622 53. Brault, M. L. *et al.* Multiple C2 domains and transmembrane region proteins (MCTPs) tether membranes  
623 at plasmodesmata. *EMBO Rep.* **20**, e47182 (2019).
- 624 54. Tanvir, Z. Expression domain analysis of four members of the plasmodesmata-localized protein family  
625 in Arabidopsis. (University of Delaware, 2016).



- 626 55. Liu, L. *et al.* FTIP1 Is an essential regulator required for florigen transport. *PLoS Biol.* **10**, e1001313  
627 (2012).
- 628 56. Bel, A. J. E. van & Knoblauch, M. Sieve element and companion cell: the story of the comatose patient  
629 and the hyperactive nurse. *Funct. Plant Biol.* **27**, 477–487 (2000).
- 630 57. Bezruczyk, M. *et al.* Phloem loading via the abaxial bundle sheath cells in maize leaves. *Nat. Plants*  
631 **submitted**.
- 632 58. Kühn, C., Franceschi, V. R., Schulz, A., Lemoine, R. & Frommer, W. B. Macromolecular trafficking  
633 indicated by localization and turnover of sucrose transporters in enucleate sieve elements. *Science* **275**,  
634 1298–300 (1997).
- 635 59. Chen, L. Q. *et al.* A cascade of sequentially expressed sucrose transporters in the seed coat and  
636 endosperm provides nutrition for the *Arabidopsis* embryo. *Plant Cell* **27**, 607 (2015).
- 637 60. Fischer, W.-N. *et al.* Amino acid transport in plants. *Trends Plant Sci.* **3**, 188–195 (1998).
- 638 61. Kuromori, T., Sugimoto, E. & Shinozaki, K. Intertissue signal transfer of abscisic acid from vascular  
639 cells to guard cells. *Plant Physiol.* **164**, 1587 (2014).
- 640 62. Kanno, Y. *et al.* AtSWEET13 and AtSWEET14 regulate gibberellin-mediated physiological processes.  
641 *Nat. Comm.* **7**, 13245 (2016).
- 642 63. Ye, Z.-W. *et al.* Arabidopsis acyl-CoA-binding protein ACBP6 localizes in the phloem and affects  
643 jasmonate composition. *Plant Mol. Biol.* **92**, 717–730 (2016).
- 644 64. Nguyen, C. T., Martinoia, E. & Farmer, E. E. Emerging jasmonate transporters. *Mol Plant* **10**, 659–661  
645 (2017).
- 646 65. Butler, A., Hoffman, P., Smibert, P., Papalex, E. & Satija, R. Integrating single-cell transcriptomic data  
647 across different conditions, technologies, and species. *Nat Biotech* **36**, 411–420 (2018).

- 648 66. Hafemeister, C. & Satija, R. Normalization and variance stabilization of single-cell RNA-seq data using  
649 regularized negative binomial regression. *Genome Biology* **20**, 296 (2019).
- 650 67. Dobin, A. *et al.* STAR: ultrafast universal RNA-seq aligner. *Bioinformatics* **29**, 15–21 (2012).
- 651 68. Mueller, L. A., Zhang, P. & Rhee, S. Y. AraCyc: a biochemical pathway database for Arabidopsis. *Plant*  
652 *Physiol* **132**, 453–460 (2003).
- 653 69. Kim, E.-J. *et al.* Plant U-Box40 Mediates Degradation of the Brassinosteroid-Responsive Transcription  
654 Factor BZR1 in Arabidopsis Roots. *Plant Cell* **31**, 791–808 (2019).
- 655 70. Zhang, X., Henriques, R., Lin, S.-S., Niu, Q.-W. & Chua, N.-H. Agrobacterium-mediated transformation  
656 of *Arabidopsis thaliana* using the floral dip method. *Nat. Prot.* **1**, 641–646 (2006).
- 657 71. Martin, T., Wöhner, R. V., Hummel, S., Willmitzer, L. & Frommer, W. B. The GUS reporter system as  
658 a tool to study plant gene expression. in *GUS protocols: using the GUS gene as a reporter of gene*  
659 *expression* (ed. Gallagher, S. R.) 23–43 (Academic Press, 1992).
- 660 72. Lemoine, F. *et al.* NGPhylogeny.fr: new generation phylogenetic services for non-specialists. *Nucleic*  
661 *Acids Research* **47**, W260–W265 (2019).
- 662 73. Liu, Z. *et al.* Global dynamic molecular profiling of stomatal lineage cell development by single-cell  
663 RNA sequencing. *Molecular Plant* **13**, 1178–1193 (2020).
- 664 74. Wang, Y., Huan, Q., Chu, X., Li, K. & Qian, W. Single-cell transcriptome analyses recapitulate the  
665 cellular and developmental responses to abiotic stresses in rice. *bioRxiv* 2020.01.30.926329 (2020)  
666 doi:10.1101/2020.01.30.926329.
- 667 75. Truernit, E., Bauby, H., Belcram, K., Barthélémy, J. & Palauqui, J.-C. OCTOPUS, a polarly localised  
668 membrane-associated protein, regulates phloem differentiation entry in *Arabidopsis thaliana*.  
669 *Development* **139**, 1306 (2012).
- 670 76. Depuydt, S. *et al.* Suppression of *Arabidopsis* protophloem differentiation and root meristem growth by  
671 CLE45 requires the receptor-like kinase BAM3. *Proc Natl Acad Sci U S A* **110**, 7074–7079 (2013).

- 672 77. Hardtke, C. S. & Berleth, T. The *Arabidopsis* gene MONOPTEROS encodes a transcription factor  
673 mediating embryo axis formation and vascular development. *EMBO J* **17**, 1405–1411 (1998).
- 674 78. Smit, M. E. *et al.* A PXY-mediated transcriptional network integrates signaling mechanisms to control  
675 vascular development in *Arabidopsis*. *Plant Cell* **32**, 319 (2020).
- 676 79. Lee, K.-H., Utku, A., Qi, L. & Wang, H. The  $\alpha$ -Aurora Kinases Function in Vascular Development in  
677 *Arabidopsis*. *Plant and Cell Physiology* **60**, 188–201 (2018).
- 678 80. Koroleva, O. A. & Cramer, R. Single-cell proteomic analysis of glucosinolate-rich S-cells in *Arabidopsis*  
679 *thaliana*. *Methods* **54**, 413–423 (2011).
- 680 81. Nintemann, S. J. *et al.* Localization of the glucosinolate biosynthetic enzymes reveals distinct spatial  
681 patterns for the biosynthesis of indole and aliphatic glucosinolates. *Physiol. Plant.* **163**, 138–154 (2018).
- 682 82. Li, J., Kristiansen, K. A., Hansen, B. G. & Halkier, B. A. Cellular and subcellular localization of flavin-  
683 monooxygenases involved in glucosinolate biosynthesis. *J. Exp. Bot.* **62**, 1337–1346 (2010).
- 684 83. Hunziker, P., Halkier, B. A. & Schulz, A. *Arabidopsis* glucosinolate storage cells transform into phloem  
685 fibres at late stages of development. *J. Exp. Bot.* **70**, 4305–4317 (2019).
- 686 84. Gigolashvili, T. *et al.* The transcription factor HIG1/MYB51 regulates indolic glucosinolate biosynthesis  
687 in *Arabidopsis thaliana*. *Plant J.* **50**, 886–901 (2007).
- 688 85. Aubry, S., Smith-Unna, R. D., Bournnell, C. M., Kopriva, S. & Hibberd, J. M. Transcript residency on  
689 ribosomes reveals a key role for the *Arabidopsis thaliana* bundle sheath in sulfur and glucosinolate  
690 metabolism. *The Plant Journal* **78**, 659–673 (2014).

691

692

693 **ACKNOWLEDGEMENTS**

694 We thank Colin P. S. Kruse (Los Alamos National Laboratory, USA) for constructive comments on the  
695 metabolic pathway activity analysis, Thomas Hartwig (WBF lab) for cDNA library preparation for bulk  
696 RNA-sequencing, Sebastian Hänsch for assistance with confocal microscope imaging (Center for Advanced  
697 Imaging, HHU, Germany), and Xiaoqing Qu (Bio-Protocol, China) for helping with the generation of  
698 pSWEET13:SWEET13-YFP construct. This research was supported by the National Science Foundation  
699 (SECRETome Project: Systematic Evaluation of CellulaR Export from plant cells, IOS-1546879), Deutsche  
700 Forschungsgemeinschaft (DFG, German Research Foundation) under Germany's Excellence Strategy –  
701 EXC-2048/1 – project ID 390686111 and SFB 1208 – Project-ID 267205415, as well as the Alexander von  
702 Humboldt Professorship to WBF.

703

704 **AUTHOR INFORMATION**

705 **Affiliations**

706 **Institute for Molecular Physiology and Cluster of Excellence on Plant Sciences (CEPLAS), Heinrich-**  
707 **Heine-University Düsseldorf, Düsseldorf 40225, Germany**

708 Ji-Yun Kim, Diana Weidauer, Margaret Bezruczyk, Manuel Miras, Michael M. Wudick, Nora Zöllner &  
709 Wolf B. Frommer

710 **Center for Plant Molecular Biology, University of Tübingen, Auf der Morgenstelle 32, 72076 Tübingen,**  
711 **Germany**

712 Efthymia Symeonidi, Tom Denyer & Marja C.P Timmermans

713 **Institute for Computer Science and Department of Biology, Heinrich-Heine-University Düsseldorf,**  
714 **Düsseldorf 40225, Germany**

715 Tin Yau Pang & Martin Lercher

716 **Institute of Transformative Bio-Molecules (WPI-ITbM), Nagoya University, Chikusa, Nagoya 464-**  
717 **8601, Japan**

718 Wolf B. Frommer

719 **Department of Plant Biology, School of Integrative Biology, University of Illinois at Urbana-**  
720 **Champaign, Urbana, Illinois 61801, U.S.A**

721 Li-Qing Chen

722

723 **Author contributions**

724 J.Y.K. and W.B.F. conceived and supervised the projects. J.Y.K. and T.D. generated the scRNA-seq libraries.  
725 E.S. and J.Y.K. performed bioinformatics analyses. J.Y.K., M.B., M.M., M.M.W. and W.B.F. analyzed  
726 clusters, J.Y.K., D.W., N.Z., and L.Q.C. generated and analyzed reporter lines. T.Y.P. performed metabolic  
727 pathway activity analyses in consultation with M.J.L., J.Y.K. and W.B.F. wrote the manuscript. All authors  
728 discussed the results and commented on the manuscript.

729

730 **ETHIC DECLARATIONS**

731 **Competing interests**

732 The authors declare no competing interests.

733

734 **SUPPLEMENTARY INFORMATION**

735 Supplementary Text

736 Supplementary Figs 1-13, Supplementary Tables 1-15, Supplementary Video 1

737

738 **Correspondence and requests for materials** should be addressed to Ji-Yun Kim (email: [jiyun.kim@hhu.de](mailto:jiyun.kim@hhu.de)).

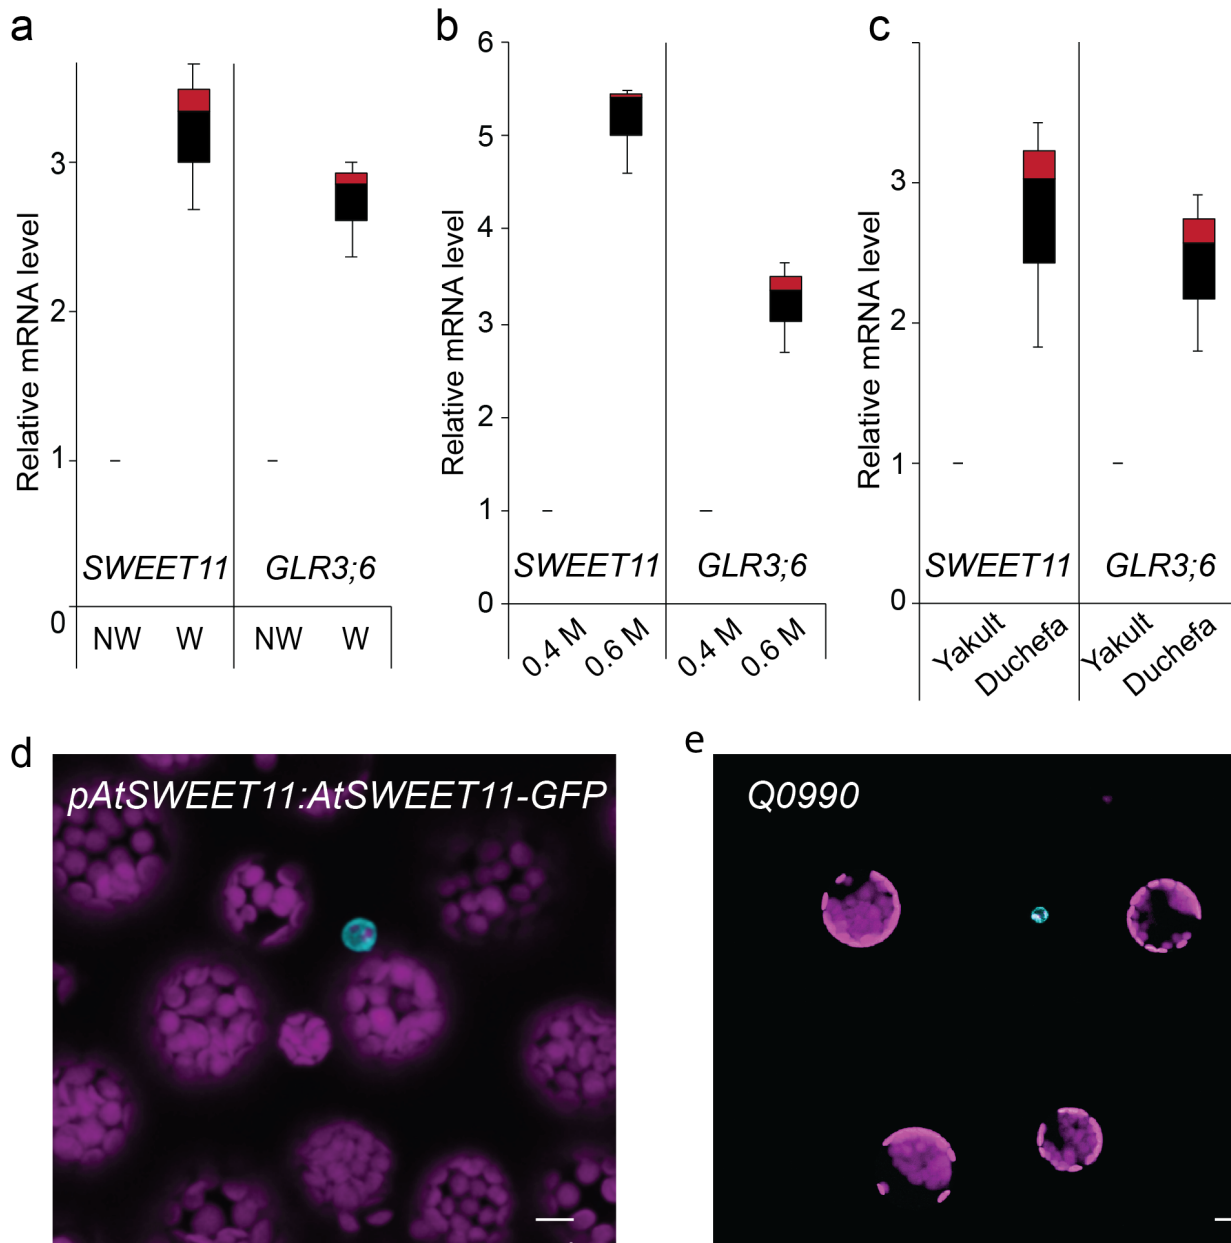

739

740 **Fig. 1: Strategies to enrich vascular protoplasts**

741 **a-c**, Box plot representation of the RT-qPCR analysis results showing the relative transcript level of the  
742 marker for the phloem parenchyma, *SWEET11*, and the marker for xylem parenchyma, *GLR3;6*. *UBQ10* was  
743 used as an internal control for normalization. The abaxial epidermis was removed from leaves harvested from  
744 6-weeks-old plants grown under short day conditions and was treated as indicated. The data shown are from  
745 a single experiment with three technical replicates (mean  $\pm$  SE, n = 3). **a**, Leaves from which the abaxial  
746 epidermis had been stripped were either cut on each side of the main vein before enzymatic digestion of the

747 cell wall (wounded, W) or directly placed in the digesting enzyme solution (nonwounded, NW). **b**, Leaves  
748 from which the abaxial epidermis had been stripped were cut on each side of the main vein and incubated in  
749 the enzyme solution containing 0.4 M or 0.6 M mannitol. **c**, Protoplasts isolated from leaf sample prepared  
750 as in **b** were incubated in an enzyme solution composed of cell wall degrading enzymes (cellulase Onozuka  
751 R-10, macerozyme R-10) obtained from Yakult (Tokyo) and Duchefa (Haarlem). **d**, GFP fluorescence (cyan)  
752 marking phloem parenchyma cells in leaf protoplasts. Protoplasts were isolated from 6-week-old  
753 *pAtSWEET11:AtSWEET11-GFP* plants expressing a phloem parenchyma cell-specific marker. Magenta,  
754 chlorophyll autofluorescence. Scale bar: 10  $\mu\text{m}$ . **e**, GFP fluorescence (cyan) marking procambium cells in  
755 leaf protoplasts. Protoplasts were isolated from 6-week-old *Q0990* plants expressing a procambium cell-  
756 specific marker. Magenta, chlorophyll autofluorescence. Scale bar: 20  $\mu\text{m}$ .



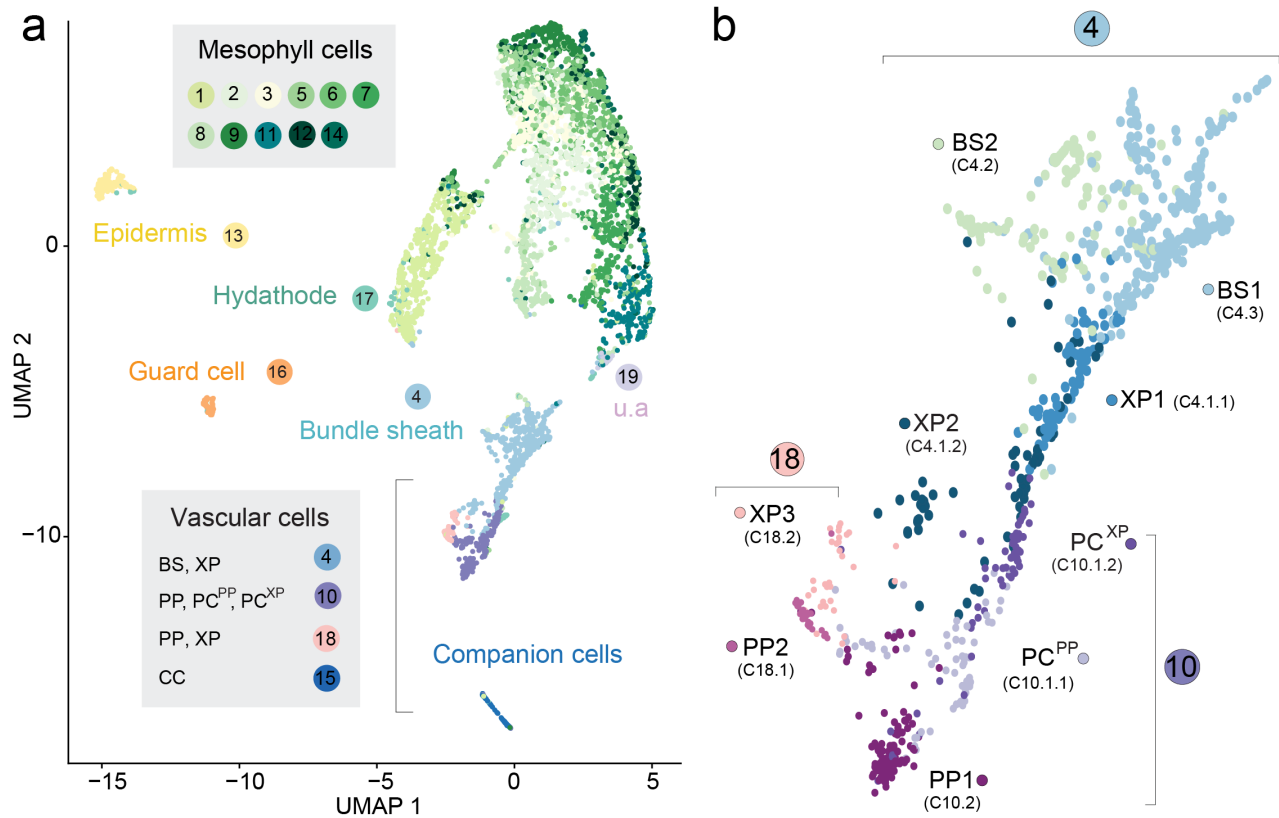

757

758

759 **Fig. 2: Assignment of cellular identity to clusters**

760 **a**, UMAP dimensional reduction projection of 5,230 Arabidopsis leaf cells. Cells were grouped into 19  
 761 distinct clusters using Seurat<sup>65</sup>. The cluster number is shown and colored based on the colors assigned to each  
 762 cell type (u.a. – unassigned, i.e., cluster could not be assigned to a known cell type). Each dot indicates  
 763 individual cells colored according to the cell type assigned. **b**, Magnification of subclusters C4, C18, and C10.  
 764 Different colors indicate distinct cell identities. PC: procambium, BS: bundle sheath, XP: xylem parenchyma,  
 765 PP: phloem parenchyma, PC<sup>XP</sup>: procambium cells with features relating to xylem differentiation, PC<sup>PP</sup>:  
 766 procambium cells with features relating to phloem differentiation.

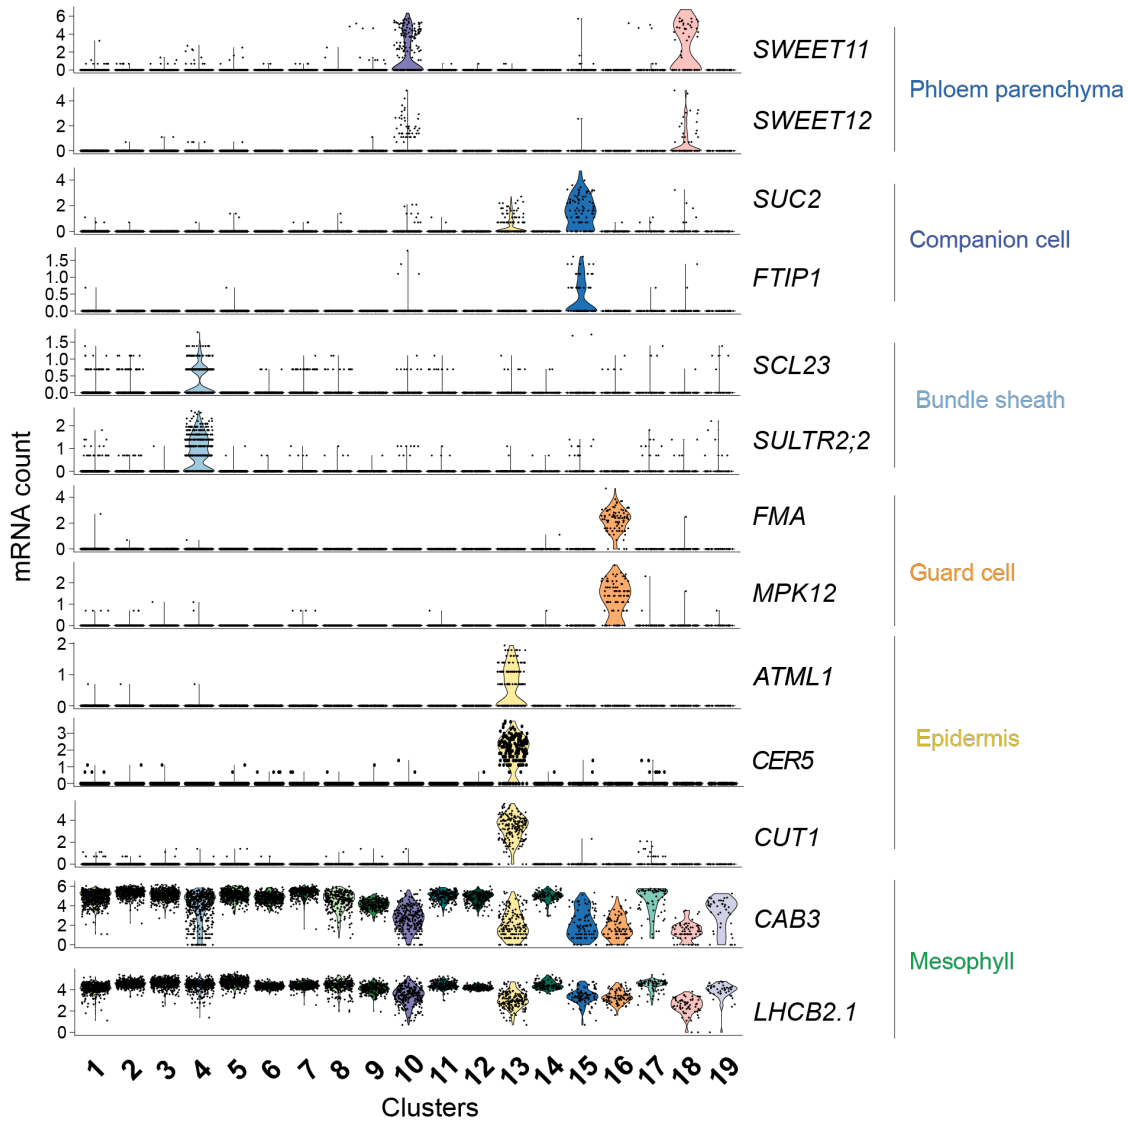

767

768

769 **Fig. 3: mRNA levels of marker genes in clusters used to assign cell types**

770 Violin plots showing transcript enrichment of known cell type-specific marker genes across clusters. Clusters

771 are indicated on the x-axis. The name of the cell type assigned to each cluster is indicated on the right side of

772 the violin plots.

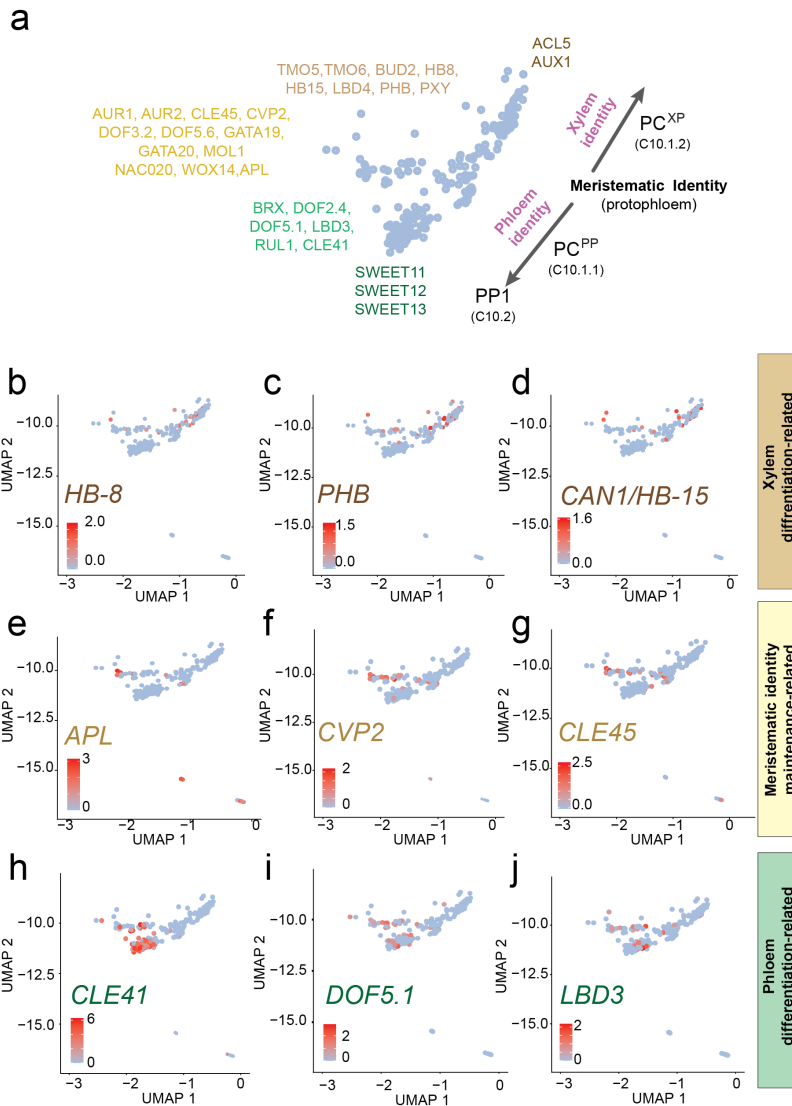

773

774 **Fig. 4: Identification of the procambium cell cluster with distinct procambium cell identities.**

775 **a**, Schematics representing subpopulations of Cluster 10. Genes enriched in the subpopulations are indicated.

776 **b-c**, UMAP showing enrichment of transcripts of genes related to xylem differentiation. **e-g**, UMAP showing

777 enrichment of transcripts of genes related to maintenance of protophloem pluripotency and differentiation.

778 **h-j**, UMAP showing the distribution transcripts related to phloem differentiation.

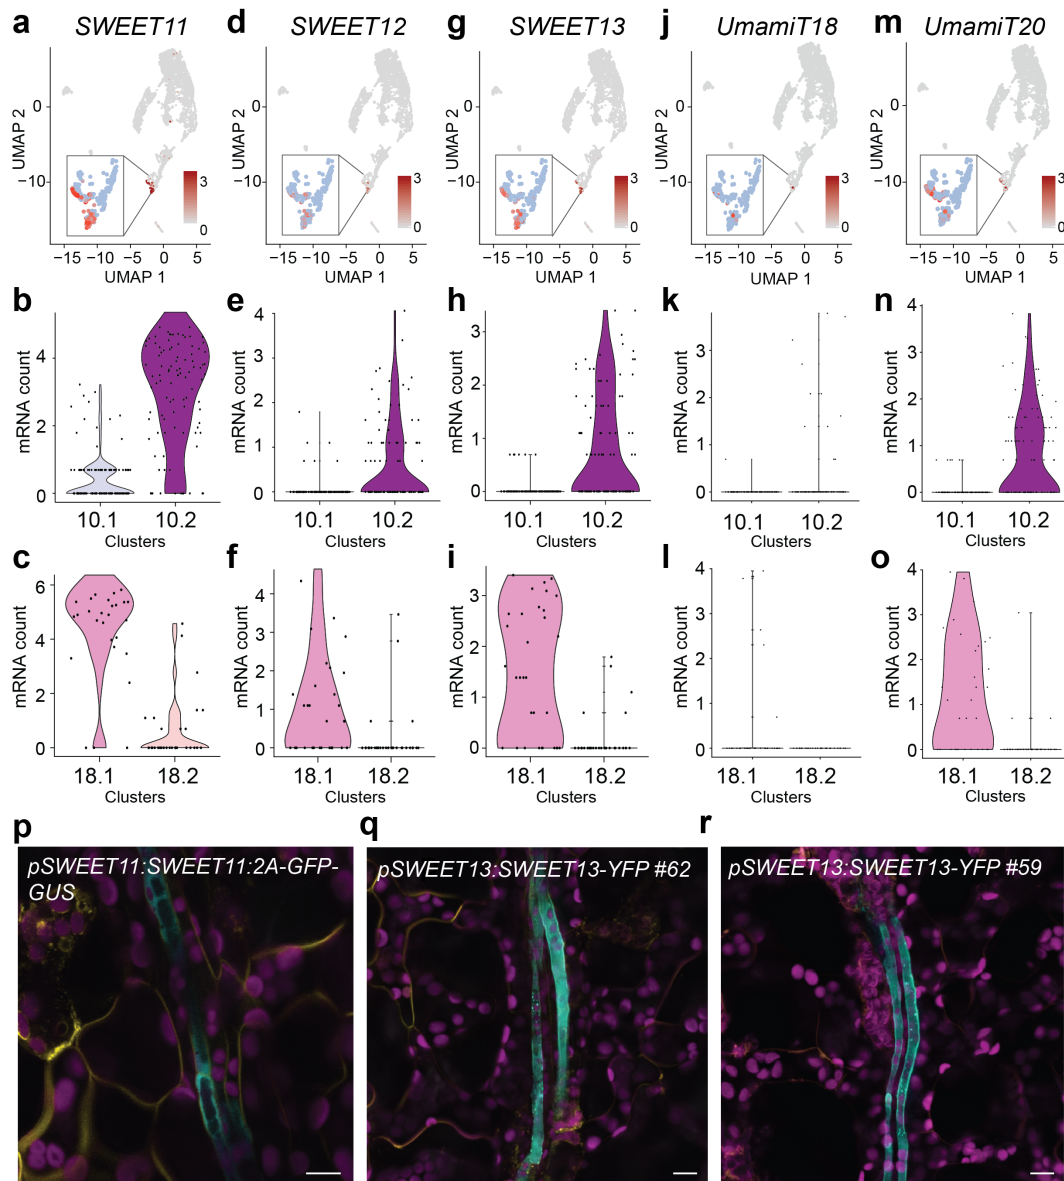

779

780 **Fig. 5: Three SWEET sucrose transporters and UmamiT amino acid transporters mark the phloem**  
 781 **parenchyma cluster**

782 **a-o**, UMAP and violin plots of C10 and C18 subclusters showing enrichment of *SWEET11*(**a-c**), *SWEET12*(**d-**  
 783 **f**), *SWEET13*(**g-i**), *UmamiT18/SIARI*(**j-l**), and *UmamiT20*(**m-o**) transcripts in phloem parenchyma clusters.  
 784 Subcluster 10.1 corresponds to PC, 18.2 to XP3, and 10.2 and 18.1 to PP. Inset show magnification of C10  
 785 and C18. **p-r**, Confocal microscopy images of *SWEET11:SWEET11-2A-GFP-GUS* and (**p**),  
 786 *pSWEET13:SWEET13-YFP*(**q,r**) transgenic plants showing specific GFP(**p**) or YFP(**q,r**) signal in the PP.

787 Magenta, chlorophyll autofluorescence. Yellow, FM4-64FX. Cyan GFP fluorescence (**p**) or YFP

788 fluorescence(**q,r**). Scale bars: 10  $\mu\text{m}$ .

789

790

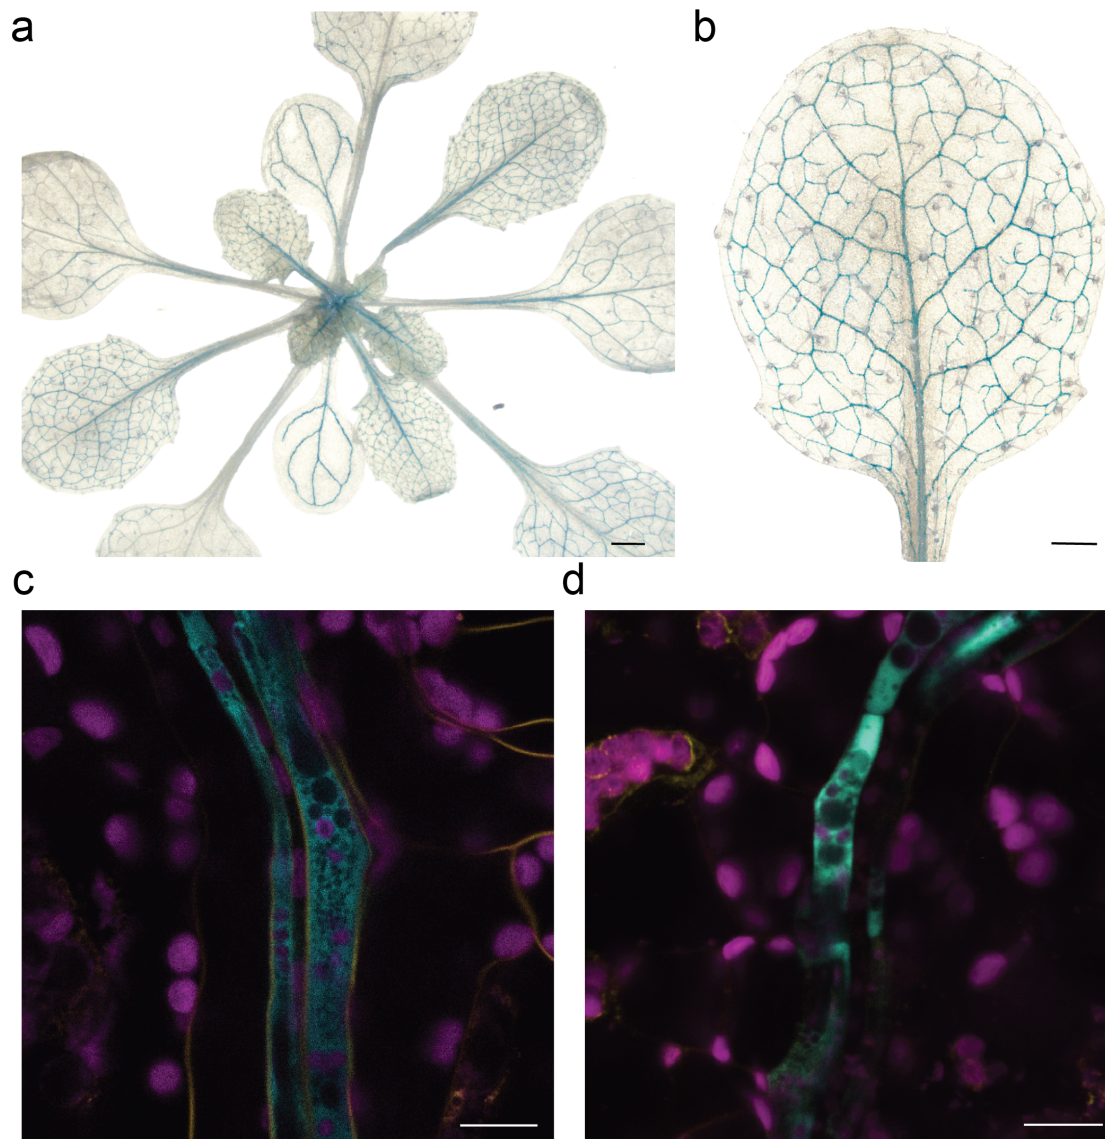

791

792

793 **Fig. 6: Reporter gene analysis of *pbZIP9:GFP-GUS* plants.**

794 **a,b**, GUS stained transgenic plants expressing the transcriptional *pbZIP9:GFP-GUS* reporter construct show

795 GUS activity in the leaf vasculature. Scale bars: 1 mm (**a**) and 0.5 mm (**b**).

796 **c,d** Confocal microscopy images of *pbZIP9:GFP-GUS* reporter lines showing GFP signal specific in the  
797 phloem parenchyma cells. Magenta, chlorophyll autofluorescence. Yellow, FM4-64FX, Cyan, GFP  
798 fluorescence. Scale bar: 10  $\mu$ m.

799



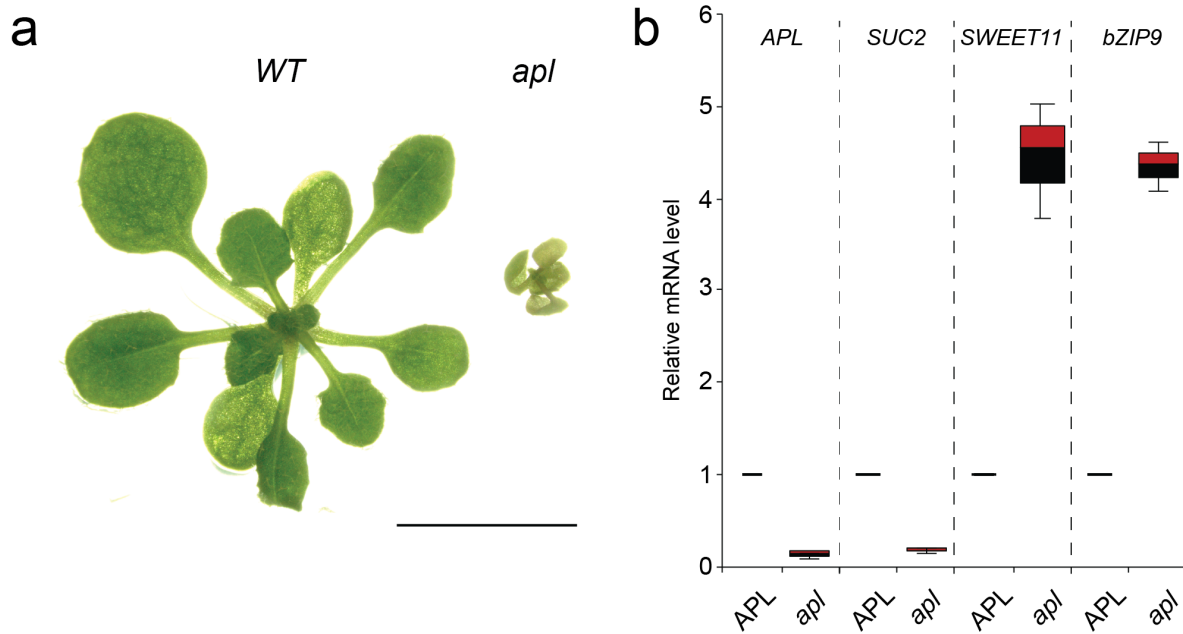

800

801 Figure 7. Distinct PP and CC marker gene expression in the *apl* mutant

802 a, Morphology of *apl* mutant (right) grown on LD conditions for 2 weeks. WT plant grown under the same  
803 condition is shown on the left side. Scale bar: 1 cm

804 b. RT-qPCR analysis of CC- marker gene (*SUC2*), and PP- marker genes (*SWEET11* and *bZIP9*). Segregating  
805 seeds from heterozygous parents were plated on MS for 2 weeks. The first and second leaves from plants  
806 homozygous for the *APL* mutation (*apl*) and heterozygous for the mutation or WT (*APL*) were collected for  
807 RNA extraction and RT-qPCR. Three independent replicates showed similar results and a representative  
808 experiment with three technical replicates are shown (mean  $\pm$  SE, n = 3).

809



810

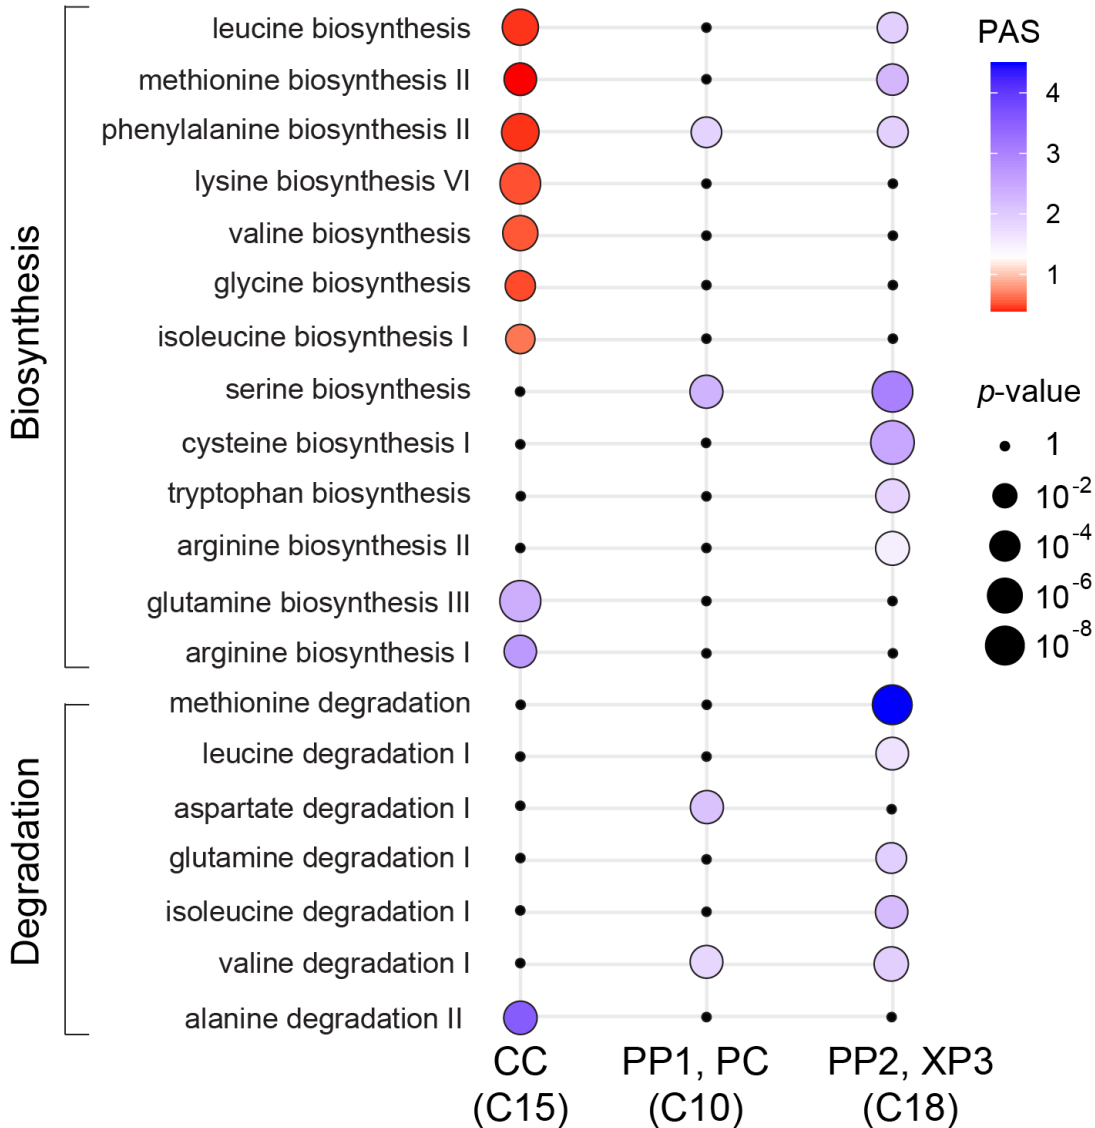

811

812 **Fig. 8. Amino acid biosynthesis and degradation pathways are differentially represented in the CC PP,**  
 813 **PC, and XP3 cells.**

814 Metabolic pathway activities of amino acid biosynthesis and degradation pathways in Clusters 15, 10, and  
 815 18. Statistical significance is represented as differences in dot size. Statistically insignificant values are shown  
 816 as black dots (random permutation test,  $p > 0.05$ ). Colors represent the pathway activity score (PAS); a score  
 817  $< 1$  (red) reflects a lower than average activity of the pathway in the given cell type, a score  $> 1$  (violet)  
 818 indicates a higher activity. Activities were compared between all clusters in the scRNA-seq dataset.

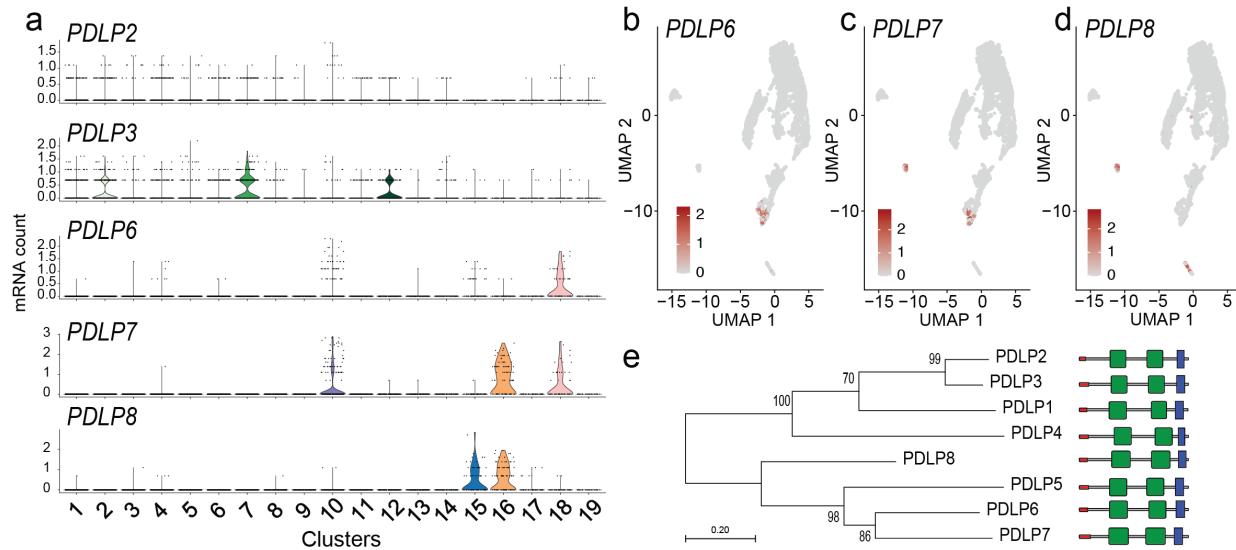

819

820

821 **Fig. 9: Transcript enrichment of *PDLP* genes in vascular cell types**

822 **a**, Violin plot showing transcript enrichment of *PDLPs*. **b-d**, UMAP plot showing the enrichment of *PDLP6*

823 **(b)**, *PDLP7* **(c)** and *PDLP8* **(d)** transcripts in the PP clusters **(b,c)**, guard cell cluster **(c,d)**, and CC cluster

824 **(d)**. **e**, Phylogenetic analysis of *PDLPs* in Arabidopsis. The phylogenetic tree was generated with the

825 maximum likelihood method implemented in PhyML<sup>72</sup>. Percent support values from 1000 bootstrap samples

826 are shown. Protein motifs predictions are based on the SMART database (<http://smart.embl-heidelberg.de>).

827 DUF26 domains, transmembrane region and signal peptide are shown in green, blue and red, respectively.

828

## 829 SUPPLEMENTARY TEXT AND DATA

### 830 Possible limitations of the scRNA-seq

831 Despite the advances in scRNA-seq technologies, application to plant cells still faces challenges since the  
832 cell walls of plant cells must be removed for the release of individual cells and the penetration of the buffers  
833 into cells. Different cell types are likely under different osmotic pressure in the intact plant which might result  
834 in breakage if the osmotic conditions are not adequate. Recent studies using *Arabidopsis*<sup>73</sup>, rice<sup>74</sup>, as well as  
835 maize<sup>57</sup> aerial tissues clearly demonstrate difficulty in capturing vascular cell types reflecting the need for  
836 careful strategy development. An unexpected challenge we faced while using loading the cells to the  
837 microfluidic chip (10X Genomics) was the sedimentation of mesophyll cells (size of < 50  $\mu$ m). This could  
838 also be true for cells from other species but not evident due to the transparent or light color of the cells.  
839 However, due to the sedimentation of cells, we observed a 30% loss in the recovery in one of our replicates  
840 (Replicate 2). Both libraries showed a high correlation and were therefore used for further analysis. The  
841 development of plant cell-specific strategies and compatible buffers will reduce the failure rate and facilitate  
842 the application of scRNA-seq analysis in plant tissues from diverse species.

### 843 Transcripts enriched in the procambial cluster

844 Several factors known to be expressed in the phloem precursor cells and play roles in the acquisition of  
845 phloem identity such as *ALTERED PHLOEM DEVELOPMENT (APL)*<sup>37</sup>, a transcription factor known to  
846 promote phloem differentiation, and phosphoinositide 5-phosphatases *COTYLEDON VASCULAR*  
847 *PATTERN 2 (CVP2)* and *CVP2 LIKE 1 (CVLI)*<sup>34</sup> were detected in the central region of Cluster 10 (C10.1.1)  
848 (Fig. 4, Supplementary Fig. 5). *BRX* and *OCTOPUS*<sup>75</sup>, important factors involved in protophloem  
849 differentiation expressed at different ends of the developing protophloem cells, were also enriched in the  
850 nonoverlapping cells in C10.1.1. The protophloem specific *CLAVATA3/EMBRYO SURROUNDING*  
851 *REGION-RELATED 45 (CLE45)* peptide required for the maintenance of pluripotent phloem cell reservoirs  
852 through the interaction with the leucine-rich repeat receptor kinase (LRR-RK), *BARELY ANY MERISTEM 3*  
853 (*BAM3*)<sup>35,36</sup>, was also detected in subset cells of the procambium cluster. The *CLE45*-enriched cells are in the

854 lower file within the central region (C10.1.1), whereas the *BAM3*-enriched cells are broadly distributed in  
855 Cluster 10 with the highest expression in cluster C10.1.1. The distribution of *CLE45* and *BAM3*-expressing  
856 cells in our UMAP is reminiscent of the overlapping and nonoverlapping distribution pattern of *CLE45* and  
857 *BAM3* in roots<sup>76</sup> suggesting that the mechanism for retaining the plastic identity of the root might also be  
858 present in the leaf.

859 Proper control of cell division and proliferation rate is a critical factor for maintaining the meristematic state  
860 of the procambium. The auxin response factor MONOPTEROS (MP)<sup>77</sup> plays a role in vascular proliferation  
861 by activating of *TARGET OF MONOPTEROS 5* and the auxin and cytokinin responsive DOF family  
862 transcription factor *TARGET OF MONOPTEROS 6 (TMO6)*. *TMO6* is further regulated by the receptor  
863 kinase PHLOEM INTERCALATED WITH XYLEM and is part of the feed-forward loop involving  
864 WUSCHEL HOMEODOMAIN RELATED 14 (WOX14), *TMO6* and LATERAL ORGAN BOUNDARIES  
865 DOMAIN 4 (LBD4). This feed-forward loop takes place the boundary of the phloem and procambium cells  
866 and influences the distribution of phloem by promoting cell division<sup>78</sup>. We detected *WOX14* transcripts in a  
867 few cells at the central region of the procambium cluster. *LBD4* and *TMO6* transcript are present in the  
868 boundary of phloem (PP, C10.2) and procambium cell cluster (C10.1.1). Others, including the plant aurora  
869 kinases that affect phloem and xylem differentiation negatively through cell division rate control<sup>79</sup>, are both  
870 enriched in the procambium cell cluster in C10.2.1(Supplementary Fig. 5). Together, we demonstrate that the  
871 leaf single-cell sequencing analysis reveals different cell identities within the procambium cluster expressing  
872 marker genes identified in various tissues (roots and stems) and show that the spatial distribution of the  
873 clusters is well correlated with the distribution of the cell types *in planta*. UMAP plots of additional  
874 procambium marker genes in the subpopulations of C10 are shown in Supplementary Fig. 5.

875

## 876 **Cluster 19 as a candidate for putative S-cell cluster**

877 Glucosinolate-rich cell type (S-cells) are found in floral stems of Arabidopsis but also described as sulfur-  
878 rich cells in the phloem parenchyma of the leaf<sup>50</sup>. S cells contain more than tenfold higher sulfur levels, and

879 high levels of glucosinolate compared to the rest of the cells and have been the functional shield of the plant  
880 vascular system from herbivores and pathogens. As the S-cells were suggested to be found in the abaxial area  
881 of phloem parenchyma in leaves, we questioned whether the S-cells are present in the PP clusters. Markers  
882 for S-cells are presently unavailable, therefore, we searched for markers that are known to be absent in S-  
883 cells. Proteomic analysis of S-cells has suggested that glucosinolates are not produced in S-cells, as  
884 biosynthetic enzymes could not be detected in isolated S-cell extracts. The promoter activities of key  
885 enzymes and markers for glucosinolate biosynthesis such as *CYTOCHROME P450 83A1*(*CYP83A1*) and  
886 *BRANCHED-CHAIN AMINOTRANSFERASE 4* (*BCAT4*) were not detected in S-cells<sup>81-83</sup>. We detected  
887 transcripts of *CYP83A1*, *BCAT4*, as well as other transcripts encoding proteins involved in the synthesis of  
888 aliphatic and indolic glucosinolates in the bundle sheath, xylem (C4) and PP/PC/XP (C10, C18) clusters  
889 (Supplementary Fig 12). The enrichment of *HIG1* transcription factor which activate promoters of genes  
890 involved in glucosinolate biosynthetic genes<sup>84</sup> (Supplementary Tables 4 and 7) also exclude the cells in the  
891 PP clusters (C10.2, C18.1) from containing S-cells and suggest the phloem parenchyma, procambium, xylem,  
892 and bundle sheath cells as sites for glucosinolate biosynthesis.

893 A unique characteristic of the S-cells is that these cells undergo programmed cell death at the early stages of  
894 differentiation. We therefore, searched for cells that could be enriched with the transcripts related to  
895 programmed cell death. We identified Cluster 19, a cluster distinct from, but closely spaced to the bundle  
896 sheath cells. This cluster was enriched with transcripts related to programmed cell death, hypersensitive  
897 response, and defense and immune response (Supplementary Table 13). This cluster also showed high activity  
898 scores in insect chewing-induced glucosinolate breakdown pathway (Supplementary Fig. 9b). This result is  
899 in line with the primary role of S-cells in releasing toxic compounds through glucosinolate breakdown upon  
900 chewing insects induced-mechanical disruption. Although we cannot rule out that these subset cells were  
901 clustered based on the stress response from the protoplasting process, they could serve as candidates as  
902 putative S-cells.

903

904 **Comprehensive PAS analysis across all cell types**

905 A complete PAS analysis is shown in Supplementary Figure 10.

906 **Highlights from the PAS analysis:**

- 907 - Glucosinolate biosynthesis activity is high in Cluster 10, Cluster 18, and Cluster 4.
- 908 - The pathway activity score of several glucosinolate biosynthesis pathways are low in the GC and CC.
- 909 - Mesophyll cells are unlikely sites for glucosinolate biosynthesis nor breakdown.
- 910 - The pathway activity scores of glucosinolate breakdown pathways are high in the guard cells.
- 911 - Cluster 19 is enriched in glucosinolate breakdown pathway induced by insect chewing.
- 912 - Cluster 18 (PP2 and XP3) is enriched with ABA, Ethylene, JA, GA biosynthesis pathways.
- 913 - Clusters 10 and 18 are enriched with callose biosynthetic pathways.
- 914 - The activity scores of photosynthesis-related pathways are low in non-mesophyll cells (epidermis, CC,  
915 guard cell, PP, PC, XP3).

916 **SUPPLEMENTARY TEXT REFERENCES**

- 917 1. Haritatos, E., Medville, R. & Turgeon, R. Minor vein structure and sugar transport in *Arabidopsis*  
918 *thaliana*. *Planta* **211**, 105–11 (2000).
- 919 2. Kang, J. & Dengler, N. Vein pattern development in adult leaves of *Arabidopsis thaliana*. *Int. J. Plant*  
920 *Sci.* **165**, 231–242 (2004).
- 921 3. Nguyen, C. T., Kurenda, A., Stolz, S., Chételat, A. & Farmer, E. E. Identification of cell populations  
922 necessary for leaf-to-leaf electrical signaling in a wounded plant. *Proc Natl Acad Sci USA* **115**, 10178  
923 (2018).
- 924 4. Arun Chinnappa, K. S., Nguyen, T. T. S., Hou, J., Wu, Y. & McCurdy, D. W. Phloem parenchyma  
925 transfer cells in *Arabidopsis* - an experimental system to identify transcriptional regulators of wall  
926 ingrowth formation. *Front Plant Sci* **4**, 102 (2013).
- 927 5. Edwards, J. *et al.* GIGANTEA is a component of a regulatory pathway determining wall ingrowth  
928 deposition in phloem parenchyma transfer cells of *Arabidopsis thaliana*. *Plant J.* **63**, 651–661 (2010).
- 929 6. Riesmeier, J. W., Willmitzer, L. & Frommer, W. B. Evidence for an essential role of the sucrose  
930 transporter in phloem loading and assimilate partitioning. *EMBO J.* **13**, 1–7 (1994).
- 931 7. Chen, L. Q. *et al.* Sucrose efflux mediated by SWEET proteins as a key step for phloem transport. *Science*  
932 **335**, 207 (2012).
- 933 8. Cayla, T., Le Hir, R. & Dinant, S. Live-cell imaging of fluorescently tagged phloem proteins with  
934 confocal microscopy. *Methods Mol. Biol.* **2014**, 95–108 (2019).
- 935 9. Denyer, T. *et al.* Spatiotemporal developmental trajectories in the *Arabidopsis* root revealed using high-  
936 throughput single-cell RNA sequencing. *Dev. Cell* **48**, 840-852.e5 (2019).
- 937 10. Ryu, K. H., Huang, L., Kang, H. M. & Schiefelbein, J. Single-cell RNA sequencing resolves molecular  
938 relationships among individual plant cells. *Plant Physiol.* **179**, 1444–1456 (2019).

- 939 11. Zhang, T.-Q., Xu, Z.-G., Shang, G.-D. & Wang, J.-W. A single-cell RNA sequencing profiles the  
940 developmental landscape of Arabidopsis root. *Mol Plant* **12**, 648–660 (2019).
- 941 12. Shulse, C. N. *et al.* High-throughput single-cell transcriptome profiling of plant cell types. *Cell Rep.* **27**,  
942 2241-2247.e4 (2019).
- 943 13. Jean-Baptiste, K. *et al.* Dynamics of Gene Expression in Single Root Cells of Arabidopsis thaliana. *Plant*  
944 *Cell* **31**, 993 (2019).
- 945 14. Birnbaum, K. *et al.* A gene expression map of the *Arabidopsis* root. *Science* **302**, 1956–60 (2003).
- 946 15. Wu, F.-H. *et al.* Tape-*Arabidopsis* Sandwich - a simpler *Arabidopsis* protoplast isolation method. *Plant*  
947 *Meth.* **5**, 16 (2009).
- 948 16. Radoeva, T., ten Hove, C. A., Saiga, S. & Weijers, D. Molecular characterization of *Arabidopsis*  
949 GAL4/UAS enhancer trap lines identifies novel cell-type-specific promoters. *Plant Physiol.* **171**, 1169  
950 (2016).
- 951 17. Satija, R., Farrell, J. A., Gennert, D., Schier, A. F. & Regev, A. Spatial reconstruction of single-cell gene  
952 expression data. *Nat. Biotech.* **33**, 495–502 (2015).
- 953 18. McInnes, L., Healy, J. & Melville, J. UMAP: uniform manifold approximation and projection for  
954 dimension reduction. *arXiv eprint arXiv:1802.03426*, (2018).
- 955 19. Sawchuk, M. G., Donner, T. J., Head, P. & Scarpella, E. Unique and overlapping expression patterns  
956 among members of photosynthesis-associated nuclear gene families in *Arabidopsis*. *Plant Physiol.* **148**,  
957 1908 (2008).
- 958 20. Endo, M., Shimizu, H., Nohales, M. A., Araki, T. & Kay, S. A. Tissue-specific clocks in *Arabidopsis*  
959 show asymmetric coupling. *Nature* **515**, 419–422 (2014).
- 960 21. Uemoto, K., Araki, T. & Endo, M. Isolation of Arabidopsis palisade and spongy mesophyll cells.  
961 *Methods Mol. Biol.* **1830**, 141–148 (2018).



- 962 22. Takada, S., Takada, N. & Yoshida, A. *ATML1* promotes epidermal cell differentiation in *Arabidopsis*  
963 shoots. *Development* **140**, 1919 (2013).
- 964 23. Bürkle, L. *et al.* Transport of cytokinins mediated by purine transporters of the PUP family expressed in  
965 phloem, hydathodes, and pollen of *Arabidopsis*. *Plant J.* **34**, 13–26 (2003).
- 966 24. Haritatos, E., Medville, R. & Turgeon, R. Minor vein structure and sugar transport in *Arabidopsis*  
967 *thaliana*. *Planta* **211**, 105–11 (2000).
- 968 25. Endo, A. *et al.* Drought induction of *Arabidopsis* 9-cis-epoxycarotenoid dioxygenase occurs in vascular  
969 parenchyma cells. *Plant Physiol* **147**, 1984–1993 (2008).
- 970 26. Pilot, G. *et al.* Overexpression of GLUTAMINE DUMPER1 leads to hypersecretion of glutamine from  
971 hydathodes of *Arabidopsis* leaves. *Plant Cell* **16**, 1827–40 (2004).
- 972 27. Okumoto, S. *et al.* High affinity amino acid transporters specifically expressed in xylem parenchyma and  
973 developing seeds of *Arabidopsis*. *Journal of Biological Chemistry* **277**, 45338–45346 (2002).
- 974 28. Dinkeloo, K., Boyd, S. & Pilot, G. Update on amino acid transporter functions and on possible amino  
975 acid sensing mechanisms in plants. *Sem Cell Dev Biol* **74**, 105–113 (2018).
- 976 29. Madsen, S. R., Olsen, C. E., Nour-Eldin, H. H. & Halkier, B. A. Elucidating the role of transport  
977 processes in leaf glucosinolate distribution. *Plant Physiol.* **166**, 1450 (2014).
- 978 30. Nour-Eldin, H. H. *et al.* NRT/PTR transporters are essential for translocation of glucosinolate defence  
979 compounds to seeds. *Nature* **488**, 531–534 (2012).
- 980 31. Sanchez, P., Nehlin, L. & Greb, T. From thin to thick: major transitions during stem development. *Trends*  
981 *Plant Sci* **17**, 113–121 (2012).
- 982 32. Elo, A., Immanen, J., Nieminen, K. & Helariutta, Y. Stem cell function during plant vascular  
983 development. *Sem. Cell Dev. Biol.* **20**, 1097–1106 (2009).

- 984 33. Baima, S. *et al.* The *Arabidopsis* ATHB-8 HD-zip protein acts as a differentiation-promoting  
985 transcription factor of the vascular meristems. *Plant Physiol* **126**, 643–655 (2001).
- 986 34. Rodriguez-Villalon, A., Gujas, B., van Wijk, R., Munnik, T. & Hardtke, C. S. Primary root protophloem  
987 differentiation requires balanced phosphatidylinositol-4,5-biphosphate levels and systemically affects  
988 root branching. *Development* **142**, 1437 (2015).
- 989 35. Gujas, B. *et al.* A reservoir of pluripotent phloem cells safeguards the linear developmental trajectory of  
990 protophloem sieve elements. *Curr. Biol.* **30**, 755-766.e4 (2020).
- 991 36. Rodriguez-Villalon, A. *et al.* Molecular genetic framework for protophloem formation. *Proc Natl Acad*  
992 *Sci USA* **111**, 11551 (2014).
- 993 37. Bonke, M., Thitamadee, S., Mähönen, A. P., Hauser, M.-T. & Helariutta, Y. APL regulates vascular  
994 tissue identity in *Arabidopsis*. *Nature* **426**, 181–186 (2003).
- 995 38. Chen, L. Q. *et al.* Sucrose efflux mediated by SWEET proteins as a key step for phloem transport. *Science*  
996 **335**, 207–11 (2012).
- 997 39. Gottwald, J. R., Krysan, P. J., Young, J. C., Evert, R. F. & Sussman, M. R. Genetic evidence for the *in*  
998 *planta* role of phloem-specific plasma membrane sucrose transporters. *Proc Natl Acad Sci USA* **97**,  
999 13979 (2000).
- 1000 40. Ladwig, F. *et al.* Siliques are Red1 from *Arabidopsis* acts as a bidirectional amino acid transporter that  
1001 is crucial for the amino acid homeostasis of siliques. *Plant Physiol.* **158**, 1643–55 (2012).
- 1002 41. Zhang, L. *et al.* Altered xylem-phloem transfer of amino acids affects metabolism and leads to increased  
1003 seed yield and oil content in *Arabidopsis*. *Plant Cell* **22**, 3603–3620 (2010).
- 1004 42. Schachtman, D. P., Schroeder, J. I., Lucas, W. J., Anderson, J. A. & Gaber, R. F. Expression of an inward-  
1005 rectifying potassium channel by the *Arabidopsis* KAT1 cDNA. *Science* **258**, 1654–1658 (1992).
- 1006 43. Chen, L. Q. *et al.* Sugar transporters for intercellular exchange and nutrition of pathogens. *Nature* **468**,  
1007 527–532 (2010).

- 1008 44. Weichert, A. *et al.* AtPTR4 and AtPTR6 are differentially expressed, tonoplast-localized members of the  
1009 peptide transporter/nitrate transporter 1 (PTR/NRT1) family. *Planta* **235**, 311–323 (2012).
- 1010 45. Mustroph, A. *et al.* Profiling translomes of discrete cell populations resolves altered cellular priorities  
1011 during hypoxia in Arabidopsis. *Proc Natl Acad Sci USA* **106**, 18843–8 (2009).
- 1012 46. Fischer, W. N., Kwart, M., Hummel, S. & Frommer, W. B. Substrate specificity and expression profile  
1013 of amino acid transporters (AAPs) in Arabidopsis. *Journal of Biological Chemistry* **270**, 16315–16320  
1014 (1995).
- 1015 47. Atkins, C. A. Biochemical aspects of assimilate transfers along the phloem path: N-solutes in lupins.  
1016 *Austr. J. Plant Physiol.* **27**, 531–537 (2000).
- 1017 48. Metzler, A. *et al.* Plant histochemistry by correlation peak imaging. *Proc. Natl. Acad. Sci. USA* **92**,  
1018 11912–5 (1995).
- 1019 49. Xiao, Z., Dai, Z. & Locasale, J. W. Metabolic landscape of the tumor microenvironment at single cell  
1020 resolution. *Nature Communications* **10**, 3763 (2019).
- 1021 50. Koroleva, O. A., Gibson, T. M., Cramer, R. & Stain, C. Glucosinolate-accumulating S-cells in  
1022 *Arabidopsis* leaves and flower stalks undergo programmed cell death at early stages of differentiation.  
1023 *Plant J.* **64**, 456–469 (2010).
- 1024 51. Maeda, H., Song, W., Sage, T. & DellaPenna, D. Role of callose synthases in transfer cell wall  
1025 development in tocopherol deficient Arabidopsis mutants. *Frontiers in Plant Science* **5**, 46 (2014).
- 1026 52. Lee, J.-Y. *et al.* A plasmodesmata-localized protein mediates crosstalk between cell-to-cell  
1027 communication and innate immunity in Arabidopsis. *Plant Cell* **23**, 3353–3373 (2011).
- 1028 53. Brault, M. L. *et al.* Multiple C2 domains and transmembrane region proteins (MCTPs) tether membranes  
1029 at plasmodesmata. *EMBO Rep.* **20**, e47182 (2019).
- 1030 54. Tanvir, Z. Expression domain analysis of four members of the plasmodesmata-localized protein family  
1031 in Arabidopsis. (University of Delaware, 2016).

- 1032 55. Liu, L. *et al.* FTIP1 Is an essential regulator required for florigen transport. *PLoS Biol.* **10**, e1001313  
1033 (2012).
- 1034 56. Bel, A. J. E. van & Knoblauch, M. Sieve element and companion cell: the story of the comatose patient  
1035 and the hyperactive nurse. *Funct. Plant Biol.* **27**, 477–487 (2000).
- 1036 57. Bezruczyk, M. *et al.* Phloem loading via the abaxial bundle sheath cells in maize leaves. *Nat. Plants*  
1037 **submitted**.
- 1038 58. Kühn, C., Franceschi, V. R., Schulz, A., Lemoine, R. & Frommer, W. B. Macromolecular trafficking  
1039 indicated by localization and turnover of sucrose transporters in enucleate sieve elements. *Science* **275**,  
1040 1298–300 (1997).
- 1041 59. Chen, L. Q. *et al.* A cascade of sequentially expressed sucrose transporters in the seed coat and  
1042 endosperm provides nutrition for the *Arabidopsis* embryo. *Plant Cell* **27**, 607 (2015).
- 1043 60. Fischer, W.-N. *et al.* Amino acid transport in plants. *Trends Plant Sci.* **3**, 188–195 (1998).
- 1044 61. Kuromori, T., Sugimoto, E. & Shinozaki, K. Intertissue signal transfer of abscisic acid from vascular  
1045 cells to guard cells. *Plant Physiol.* **164**, 1587 (2014).
- 1046 62. Kanno, Y. *et al.* AtSWEET13 and AtSWEET14 regulate gibberellin-mediated physiological processes.  
1047 *Nat. Comm.* **7**, 13245 (2016).
- 1048 63. Ye, Z.-W. *et al.* Arabidopsis acyl-CoA-binding protein ACBP6 localizes in the phloem and affects  
1049 jasmonate composition. *Plant Mol. Biol.* **92**, 717–730 (2016).
- 1050 64. Nguyen, C. T., Martinoia, E. & Farmer, E. E. Emerging jasmonate transporters. *Mol Plant* **10**, 659–661  
1051 (2017).
- 1052 65. Butler, A., Hoffman, P., Smibert, P., Papalex, E. & Satija, R. Integrating single-cell transcriptomic data  
1053 across different conditions, technologies, and species. *Nat Biotech* **36**, 411–420 (2018).

- 1054 66. Hafemeister, C. & Satija, R. Normalization and variance stabilization of single-cell RNA-seq data using  
1055 regularized negative binomial regression. *Genome Biology* **20**, 296 (2019).
- 1056 67. Dobin, A. *et al.* STAR: ultrafast universal RNA-seq aligner. *Bioinformatics* **29**, 15–21 (2012).
- 1057 68. Mueller, L. A., Zhang, P. & Rhee, S. Y. AraCyc: a biochemical pathway database for Arabidopsis. *Plant*  
1058 *Physiol* **132**, 453–460 (2003).
- 1059 69. Kim, E.-J. *et al.* Plant U-Box40 Mediates Degradation of the Brassinosteroid-Responsive Transcription  
1060 Factor BZR1 in Arabidopsis Roots. *Plant Cell* **31**, 791–808 (2019).
- 1061 70. Zhang, X., Henriques, R., Lin, S.-S., Niu, Q.-W. & Chua, N.-H. Agrobacterium-mediated transformation  
1062 of *Arabidopsis thaliana* using the floral dip method. *Nat. Prot.* **1**, 641–646 (2006).
- 1063 71. Martin, T., Wöhner, R. V., Hummel, S., Willmitzer, L. & Frommer, W. B. The GUS reporter system as  
1064 a tool to study plant gene expression. in *GUS protocols: using the GUS gene as a reporter of gene*  
1065 *expression* (ed. Gallagher, S. R.) 23–43 (Academic Press, 1992).
- 1066 72. Lemoine, F. *et al.* NGPhylogeny.fr: new generation phylogenetic services for non-specialists. *Nucleic*  
1067 *Acids Research* **47**, W260–W265 (2019).
- 1068 73. Liu, Z. *et al.* Global dynamic molecular profiling of stomatal lineage cell development by single-cell  
1069 RNA sequencing. *Molecular Plant* **13**, 1178–1193 (2020).
- 1070 74. Wang, Y., Huan, Q., Chu, X., Li, K. & Qian, W. Single-cell transcriptome analyses recapitulate the  
1071 cellular and developmental responses to abiotic stresses in rice. *bioRxiv* 2020.01.30.926329 (2020)  
1072 doi:10.1101/2020.01.30.926329.
- 1073 75. Truernit, E., Bauby, H., Belcram, K., Barthélémy, J. & Palauqui, J.-C. OCTOPUS, a polarly localised  
1074 membrane-associated protein, regulates phloem differentiation entry in *Arabidopsis thaliana*.  
1075 *Development* **139**, 1306 (2012).
- 1076 76. Depuydt, S. *et al.* Suppression of *Arabidopsis* protophloem differentiation and root meristem growth by  
1077 CLE45 requires the receptor-like kinase BAM3. *Proc Natl Acad Sci U S A* **110**, 7074–7079 (2013).

- 1078 77. Hardtke, C. S. & Berleth, T. The *Arabidopsis* gene MONOPTEROS encodes a transcription factor  
1079 mediating embryo axis formation and vascular development. *EMBO J* **17**, 1405–1411 (1998).
- 1080 78. Smit, M. E. *et al.* A PXY-mediated transcriptional network integrates signaling mechanisms to control  
1081 vascular development in *Arabidopsis*. *Plant Cell* **32**, 319 (2020).
- 1082 79. Lee, K.-H., Utku, A., Qi, L. & Wang, H. The  $\alpha$ -Aurora Kinases Function in Vascular Development in  
1083 *Arabidopsis*. *Plant and Cell Physiology* **60**, 188–201 (2018).
- 1084 80. Koroleva, O. A. & Cramer, R. Single-cell proteomic analysis of glucosinolate-rich S-cells in *Arabidopsis*  
1085 *thaliana*. *Methods* **54**, 413–423 (2011).
- 1086 81. Nintemann, S. J. *et al.* Localization of the glucosinolate biosynthetic enzymes reveals distinct spatial  
1087 patterns for the biosynthesis of indole and aliphatic glucosinolates. *Physiol. Plant.* **163**, 138–154 (2018).
- 1088 82. Li, J., Kristiansen, K. A., Hansen, B. G. & Halkier, B. A. Cellular and subcellular localization of flavin-  
1089 monooxygenases involved in glucosinolate biosynthesis. *J. Exp. Bot.* **62**, 1337–1346 (2010).
- 1090 83. Hunziker, P., Halkier, B. A. & Schulz, A. *Arabidopsis* glucosinolate storage cells transform into phloem  
1091 fibres at late stages of development. *J. Exp. Bot.* **70**, 4305–4317 (2019).
- 1092 84. Gigolashvili, T. *et al.* The transcription factor HIG1/MYB51 regulates indolic glucosinolate biosynthesis  
1093 in *Arabidopsis thaliana*. *Plant J.* **50**, 886–901 (2007).
- 1094 85. Aubry, S., Smith-Unna, R. D., Bournnell, C. M., Kopriva, S. & Hibberd, J. M. Transcript residency on  
1095 ribosomes reveals a key role for the *Arabidopsis thaliana* bundle sheath in sulfur and glucosinolate  
1096 metabolism. *The Plant Journal* **78**, 659–673 (2014).
- 1097



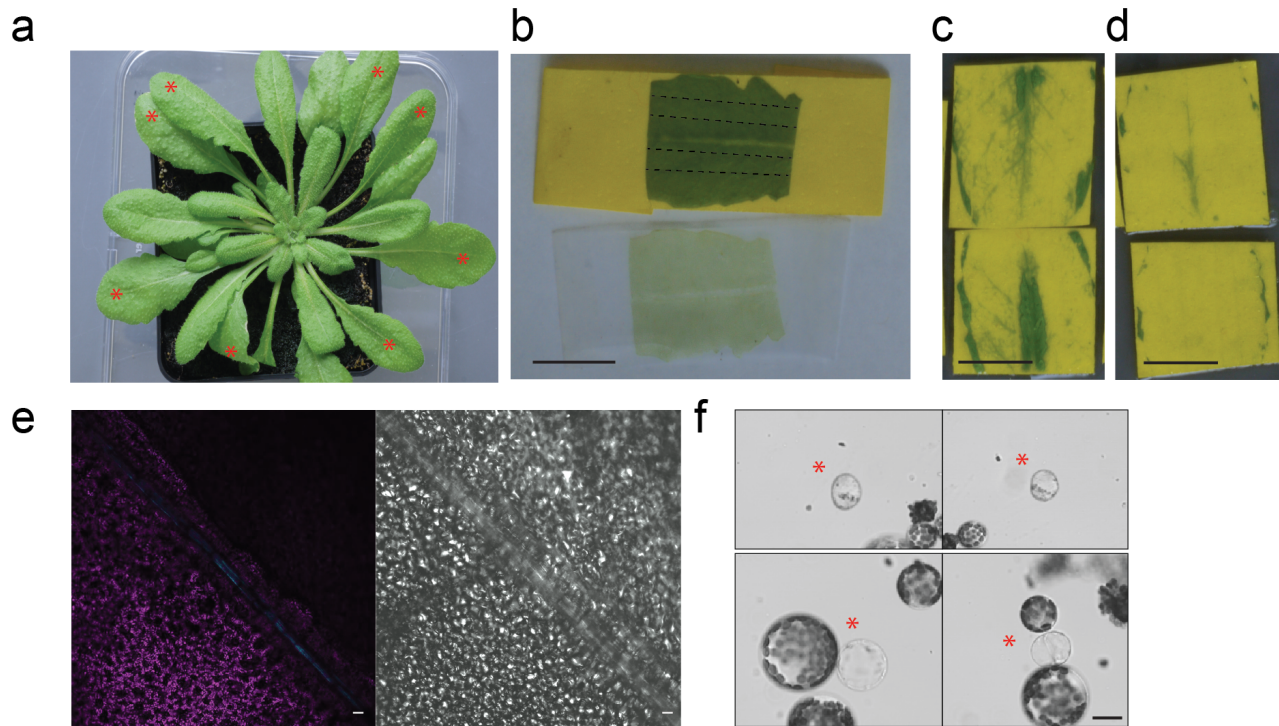

1098

1099 **Supplementary Fig. 1: Optimization of vascular protoplast enrichment**

1100 **a**, Six-week-old Arabidopsis plant grown under short-day conditions. Leaves used for protoplasting are  
1101 marked with red asterisks. **b**, Tape-sandwiched leaf explants were separated and the remaining adaxial side  
1102 was cut parallel to the main vein. Cutting sites are marked as dotted lines. Scale bar: 1 cm. **c-d**, Tape-separated  
1103 leaf explants 2 hours after enzyme digest. The release of vascular cells is more effective with an enzyme  
1104 solution in 0.6 M mannitol (**d**), compared to 0.4 M mannitol (**c**) Scale bar: 1 cm. **e**, Detection of procambial  
1105 cells in the major vein using the procambial marker *Q0990*. Scale bars: 50  $\mu$ m. **f**, Diversity of leaf protoplasts.  
1106 Protoplasts lacking chloroplasts are marked with red asterisks. Scale bar: 20  $\mu$ m

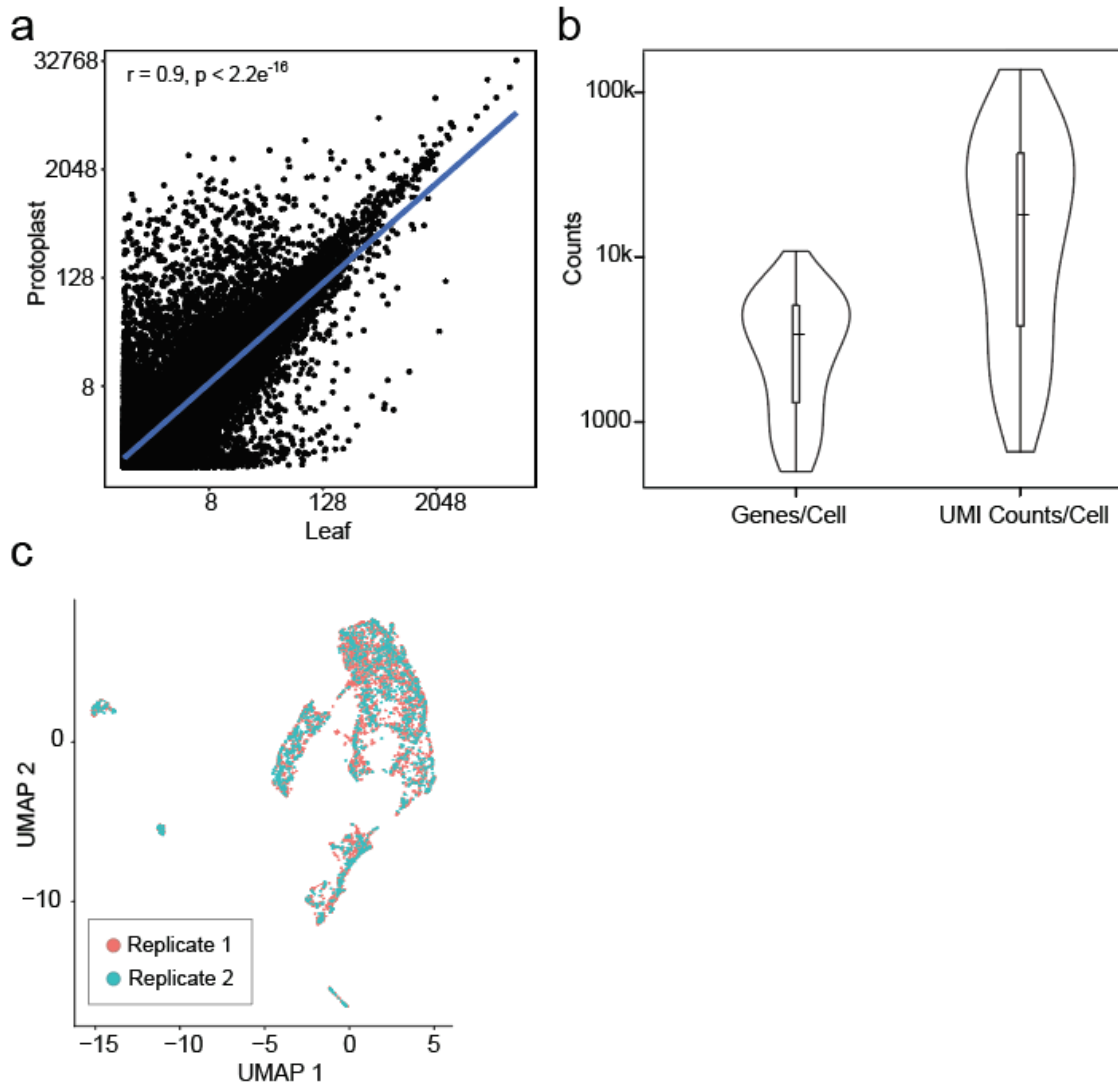

1107

1108 **Supplementary Fig. 2: Reliability of Arabidopsis leaf scRNA-seq dataset**

1109 **a**, Correlation of gene expression in bulk leaf (not protoplasted) and bulk protoplasts.  $r$  = Pearson's correlation  
1110 coefficient. The list of DEGs in bulk RNA-seq of non protoplasted leaf and protoplasted leaf samples are  
1111 provided in Supplementary Table 1. **b**, Violin plot illustrating the distribution of the number of genes  
1112 (nFeature RNA) and UMI counts (nCount RNA) detected within a cell. **c**, UMAP plot of 5,230 cell  
1113 transcriptomes from two biological replicates. Different colors indicate the cells from each replicate.



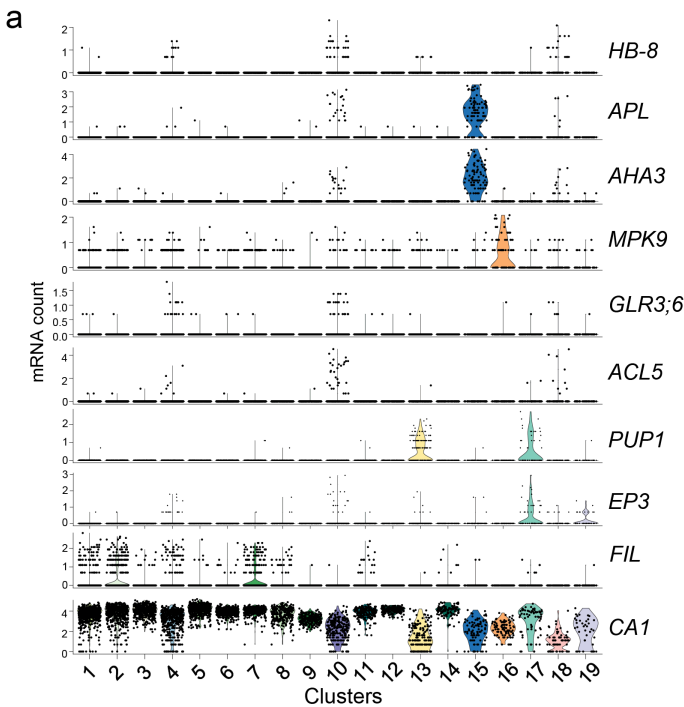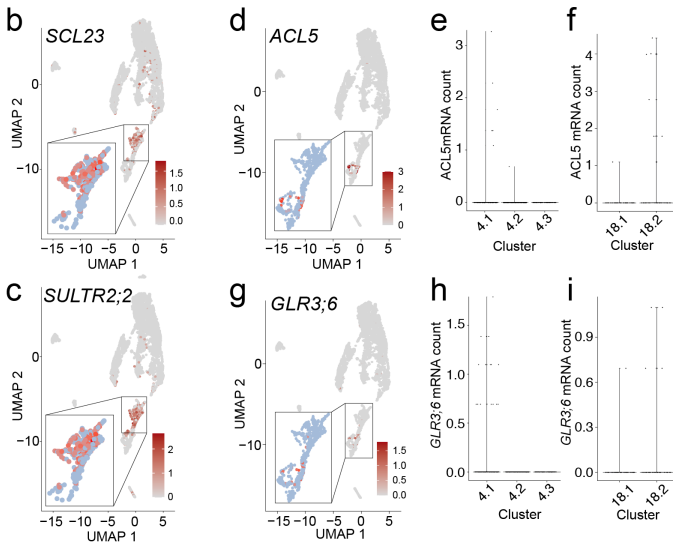

1114

1115 **Supplementary Fig. 3: Enrichment of known marker genes for assigning cell types to clusters.**

1116 **a**, Violin plots showing the expression of cell type-specific marker genes across clusters. **b,c**, UMAP plot  
 1117 illustrating the enrichment of bundle sheath (BS) markers, *SCL23* (**b**) and *SULTR2;2* (**c**). Inset shows  
 1118 magnification of Cluster 4. **d-i**, UMAP plot (**d,g**) and violin plots of the subclusters of Cluster 4 (**e,h**) and  
 1119 Cluster 18 (**f,i**) showing enrichment of xylem markers, *ACL5* (**d,e,f**) and *GLR3;6* (**g,h,i**). Magnified views of  
 1120 the boxed region (Clusters 4, 10, and 18) is shown in the insets (**d,g**).

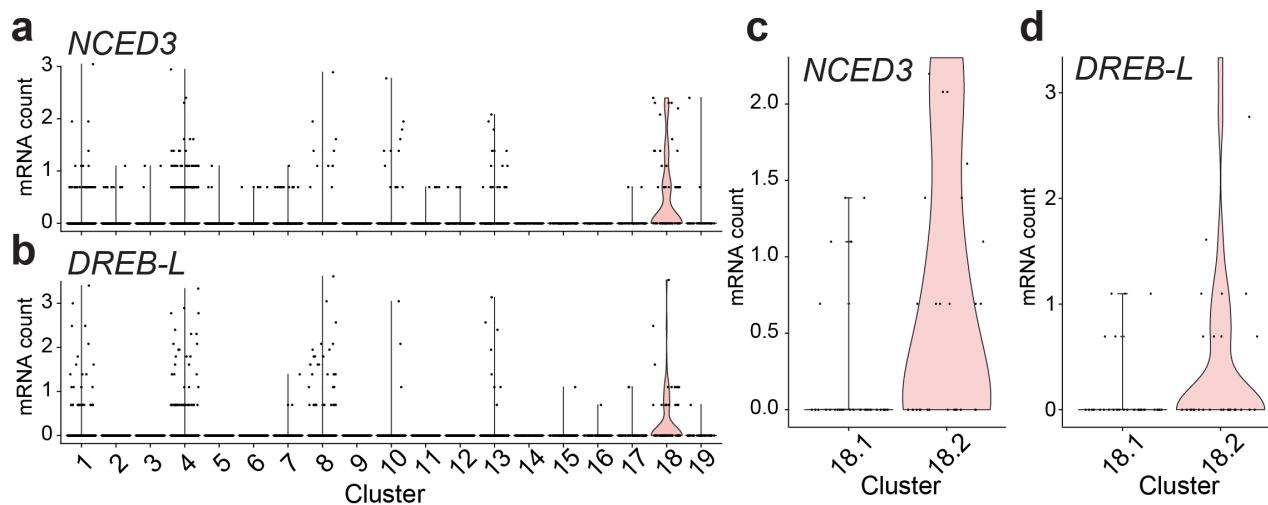

1121

1122

1123 **Supplementary Fig. 4: Vascular parenchyma-specific marker genes enriched in Cluster 18 (XP3)**

1124 **a-d**, Violin plots showing the transcript enrichment of *NCED3* (**a,c**) and *DREB-L* (**b,d**) across the main

1125 clusters (**a,b**) or subclusters of Cluster 18 (**c,d**).

1126

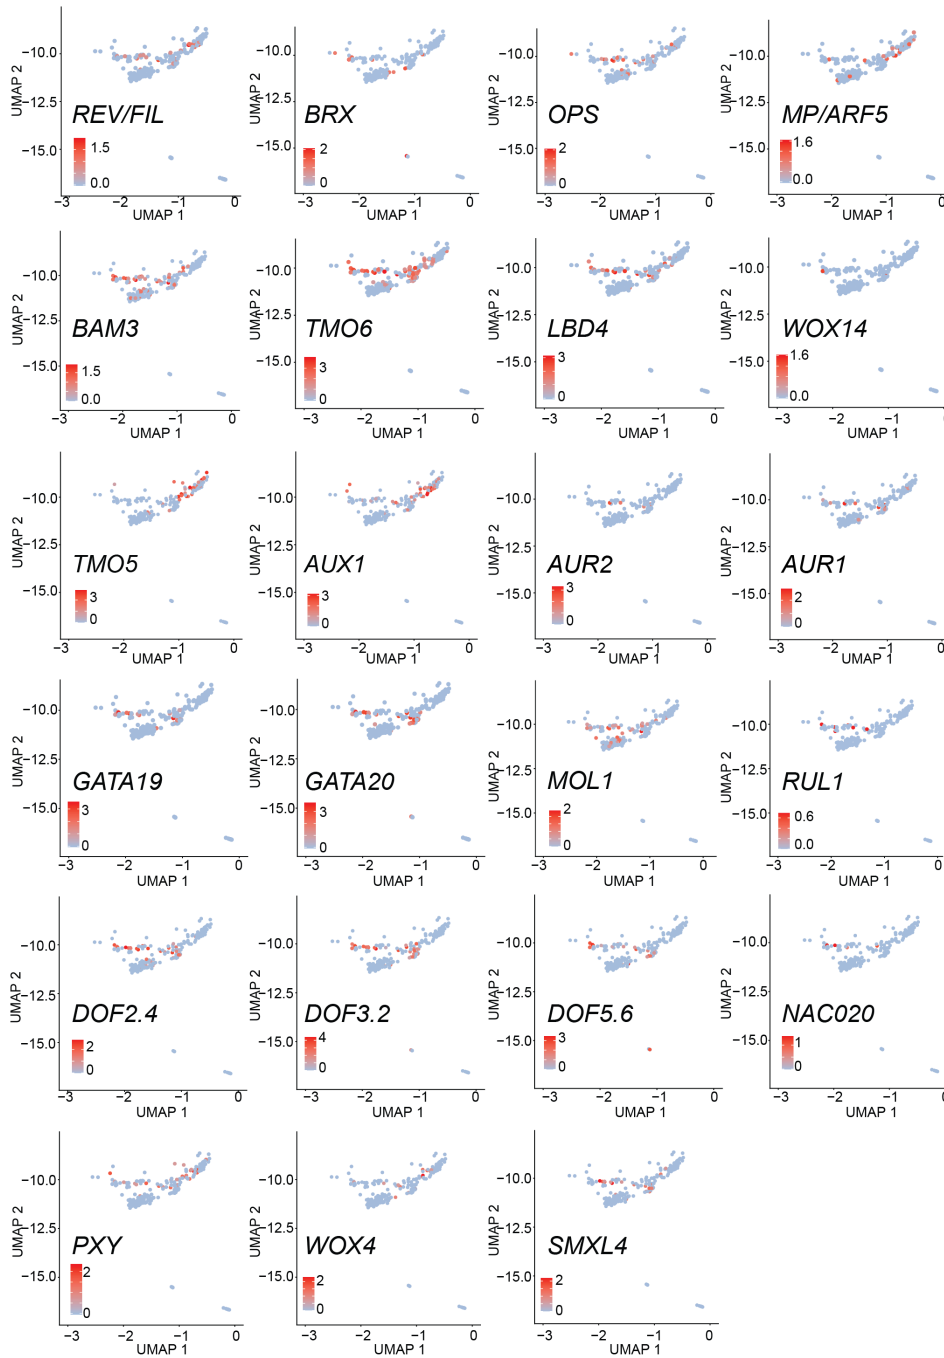

1127

1128

1129 **Supplementary Fig. 5: Distinct procambium cell identities in C10 subclusters**

1130 UMAP plot showing the distribution of transcripts enriched in C10 subclusters.

1131

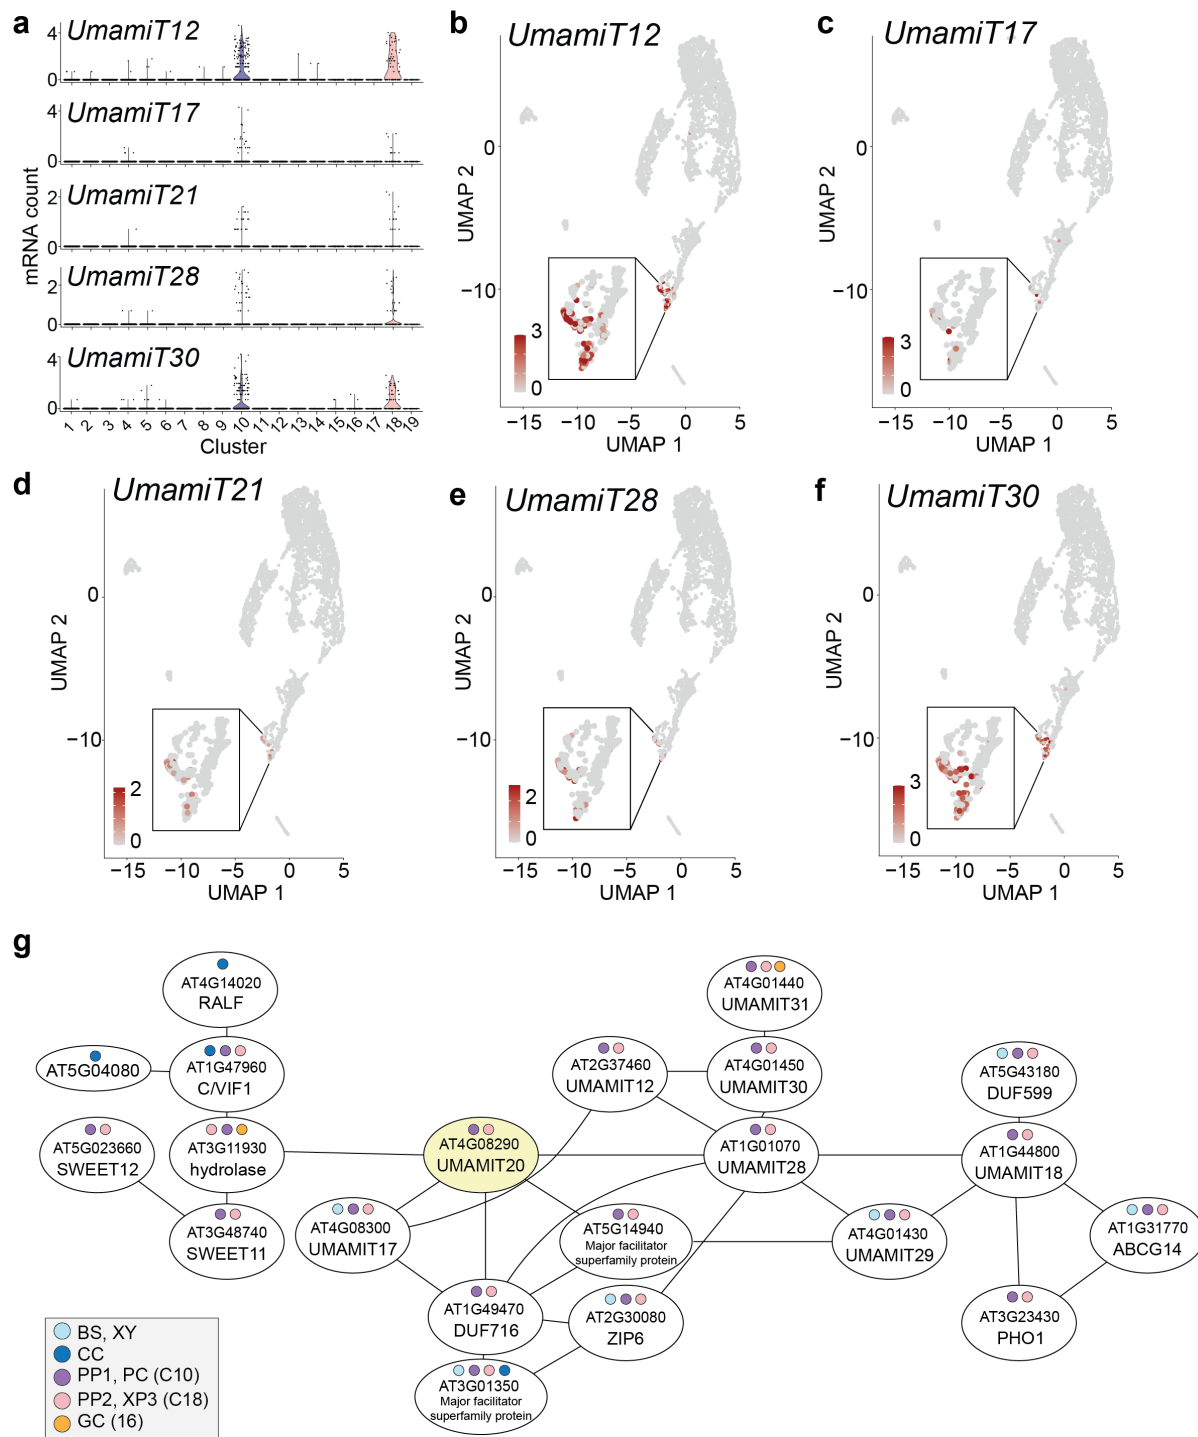

1132

1133 **Supplementary Fig. 6: Transcripts of UmamiT amino acid transport family members are enriched in**  
 1134 **the PP.**

1135 **a**, Violin plots illustrating the transcript enrichment of *UmamiT12*, *UmamiT17*, *UmamiT21*, *UmamiT28*, and  
 1136 *UmamiT30*. The cell types assigned to clusters are indicated in **Fig. 2a,b**, **b**, UMAP showing the enrichment

1137 of *UmamiT12* (**b**), *UmamiT17* (**c**), *UmamiT21* (**d**), *UmamiT28* (**e**), and *UmamiT30* (**f**). Magnifications of the  
1138 marked regions are shown in the insets. **g**, Coexpression gene network around *UmamiT20* built from the  
1139 coexpression database ATTED-II (<http://atted.jp>). The cell types in which the genes in the network are  
1140 enriched are marked with colored circles. The colors corresponding to the cell types and clusters are indicated  
1141 in the bottom left box.

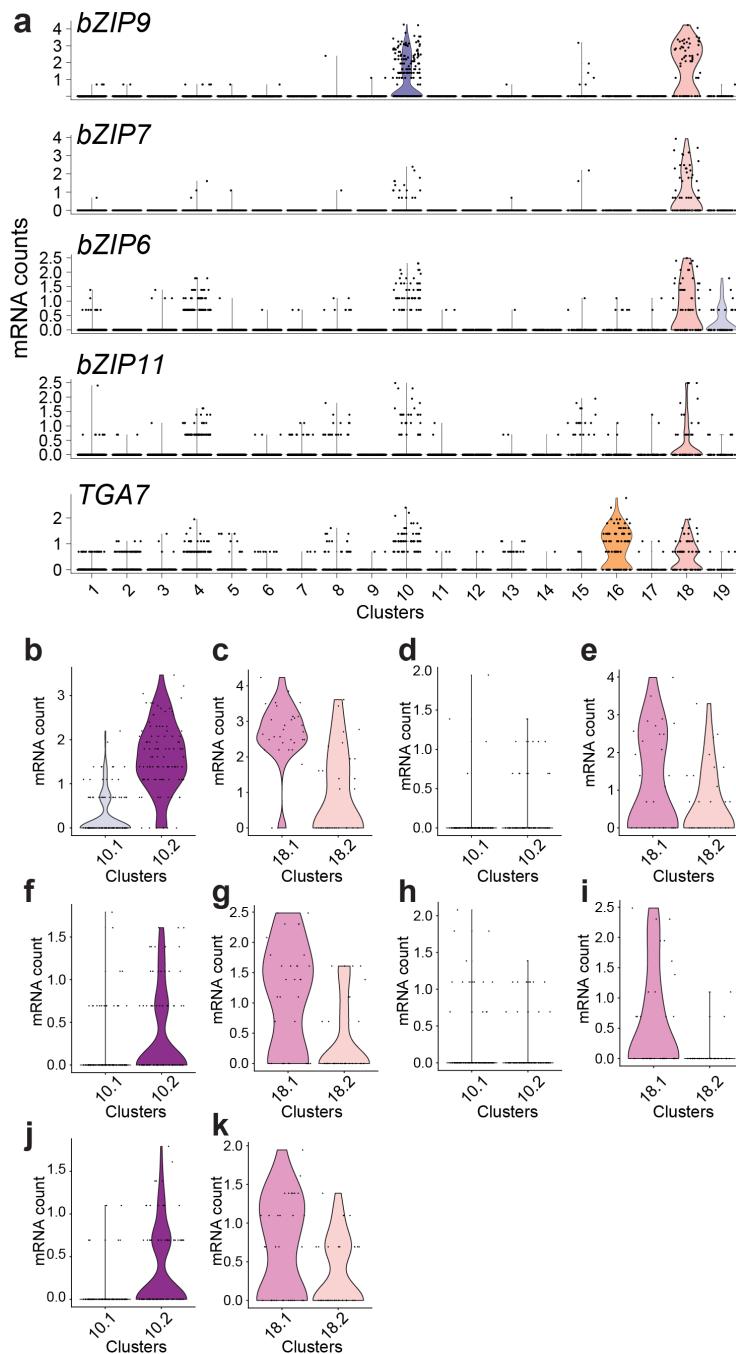

1142

1143

1144 **Supplementary Fig. 7: Transcript enrichment of multiple bZIP transcription factors in the PP clusters.**

1145 **a**, Violin plots showing transcript enrichment of five bZIP family members. **b-k**, Violin plots showing

1146 transcript enrichment of *bZIP9* (**b,c**), *bZIP7* (**d,e**), *bZIP6* (**f,g**), *bZIP11* (**h,i**), and *TGA7* (**j,k**) in the subclusters

1147 of Cluster 10 (**b,d,f,h,j**) and Cluster 18 (**c,e,g,i,k**).

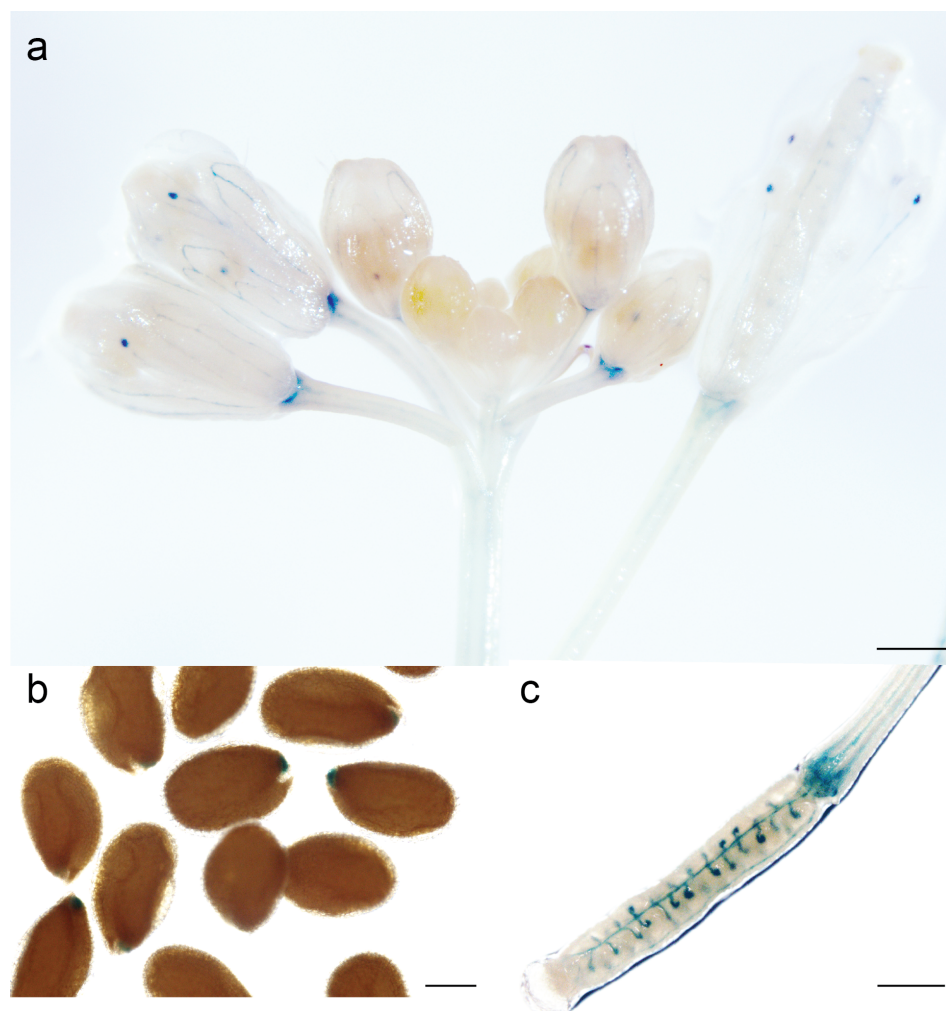

1148

1149

1150 **Supplementary Fig. 8: GUS staining of *pbZIP9:GFP-GUS* plants showed promoter activity in multiple**  
1151 **tissues and organs.**

1152 **a-c**, GUS stained *pbZIP9:GFP-GUS* transgenic plants show GUS activity in the unloading zone of the anther,  
1153 petals, and receptacle (**a**), the unloading zone of the seed coat (**b**), and the ovules, transmitting tract, and the  
1154 funiculus of the ovary (**c**). Scale bars: 500  $\mu\text{m}$  (**a,c**) and 200  $\mu\text{m}$  (**b**).

1155

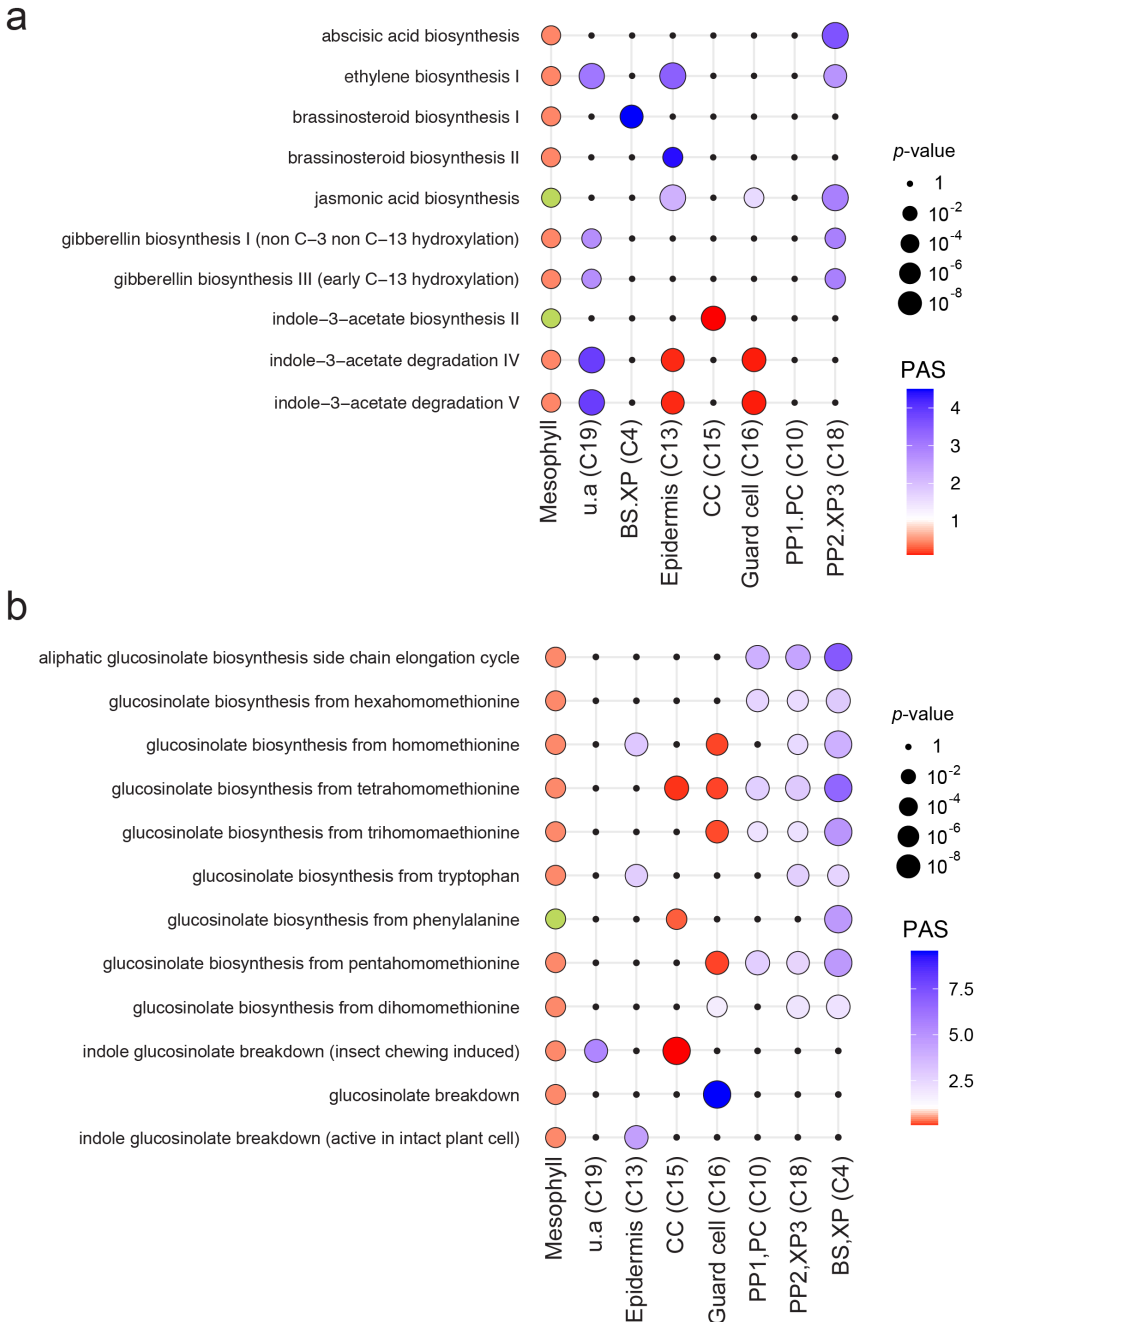

1156

1157 **Supplementary Fig. 9: Hormone and glucosinolate pathway activity across clusters.**

1158 **a**, Pathway activity score (PAS) of hormone biosynthesis and degradation pathways in the indicated clusters.

1159 **b**, Metabolic pathway activities of glucosinolate biosynthesis and degradation pathways. **a,b**, The color of

1160 the dots PAS, whereas the size of the dot corresponds to its statistical significance; PASs that are statistically

1161 insignificant, *i.e.*  $p > 0.05$  in a random permutation test, are represented by black dots with 0 size.  $PAS < 1$



1162 (red) signifies the under-representation of the genes in the pathway in the given cell type, whereas  $PAS > 1$   
1163 (violet) signifies the over-representation of the pathway. The mesophyll cells, which form multiple clusters,  
1164 are represented by a single column in both panels. Pathways represented by a red dot are significantly under-  
1165 represented in at least one cluster; pathways represented by a green dot are significantly under-represented in  
1166 at least one cluster, and also significantly over-represented in at least one cluster. The size of the dots in the  
1167 mesophyll column does not correspond to the  $p$ -value of PAS.

1168

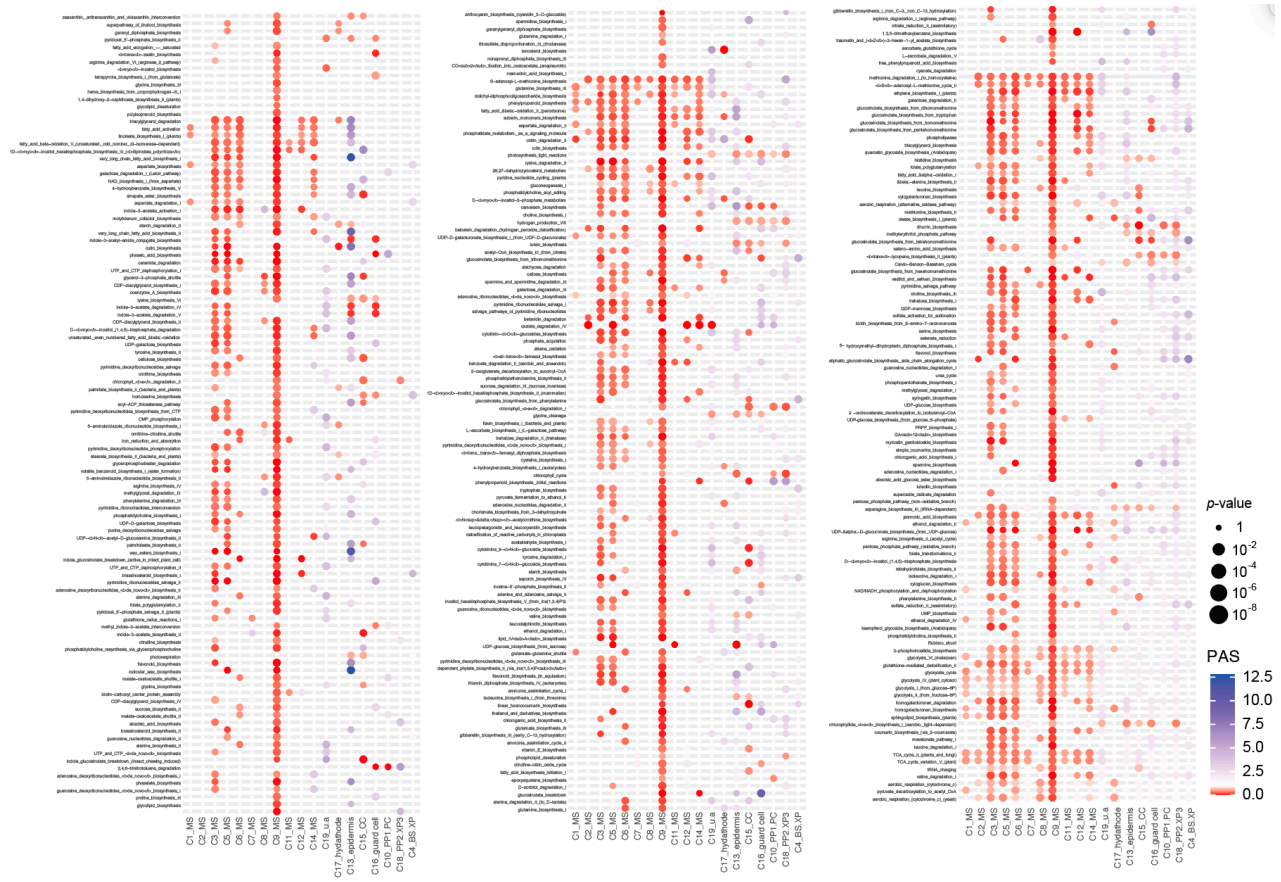

1169

1170

1171 **Supplementary Fig. 10: Metabolic pathway activity across all cell types.** Statistical significance is  
1172 represented as difference in dot size. Statistically insignificant values are left as blank (random permutation  
1173 test,  $p > 0.05$ ). Colors represent pathway activity score (PAS); a score  $< 1$  (red) reflects a lower than average  
1174 activity of the pathway in the given cell type, a score  $> 1$  (violet) indicates a higher activity.

1175

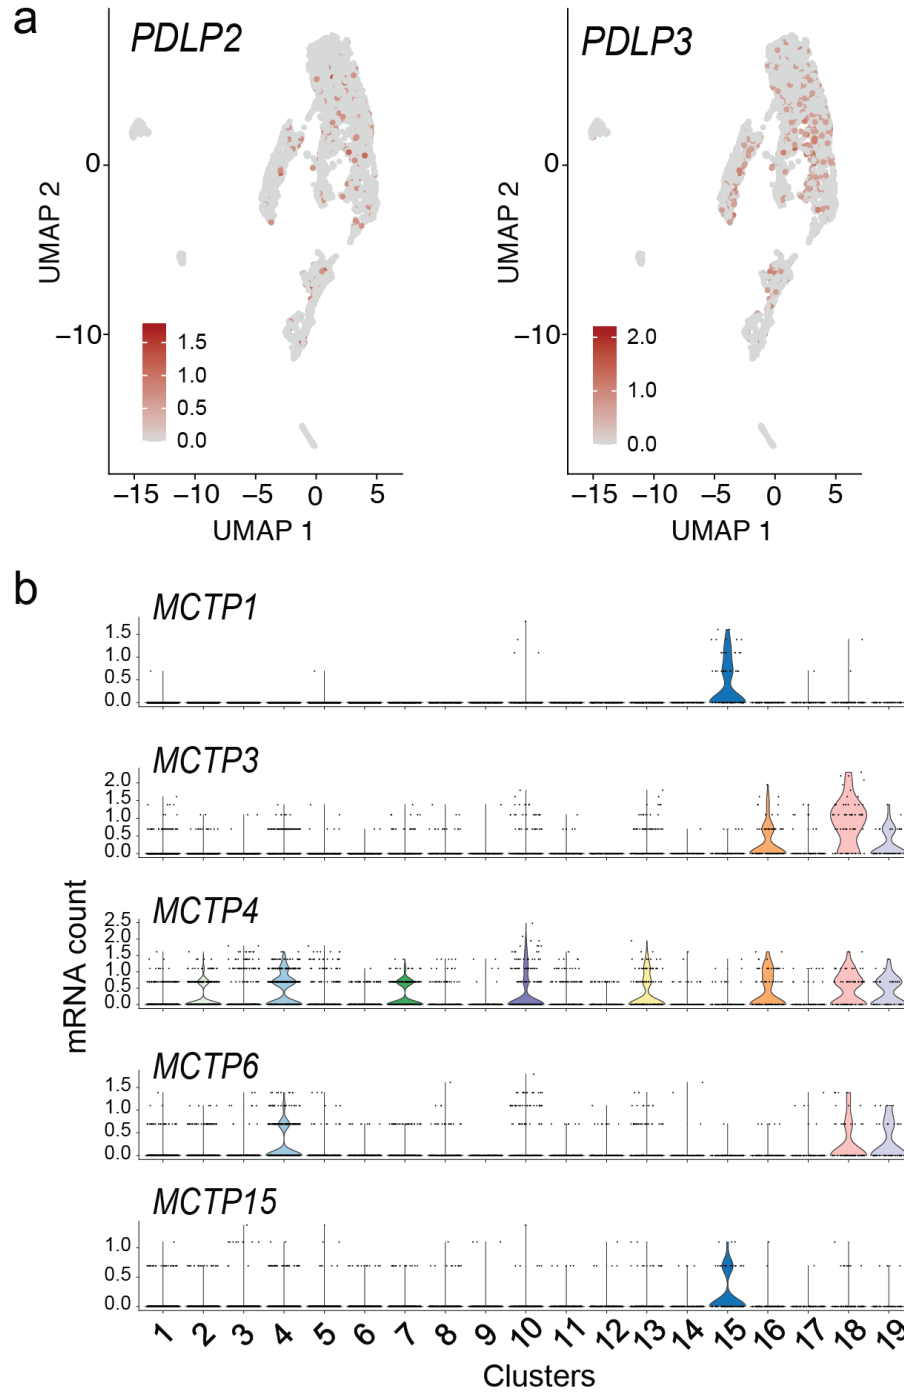

1176

1177 **Supplementary Fig. 11: Cell type-specific transcript enrichment of plasmodesmatal proteins.**

1178 **a**, UMAP plot showing the distribution of *PDLP2* and *PDLP3* transcripts. **b**, Violin plot showing transcript

1179 enrichment of *MCTPs*. Note that *MCTP1* and *FTIPI* (in Fig. 3) correspond to the same gene, AT5G06850.

1180

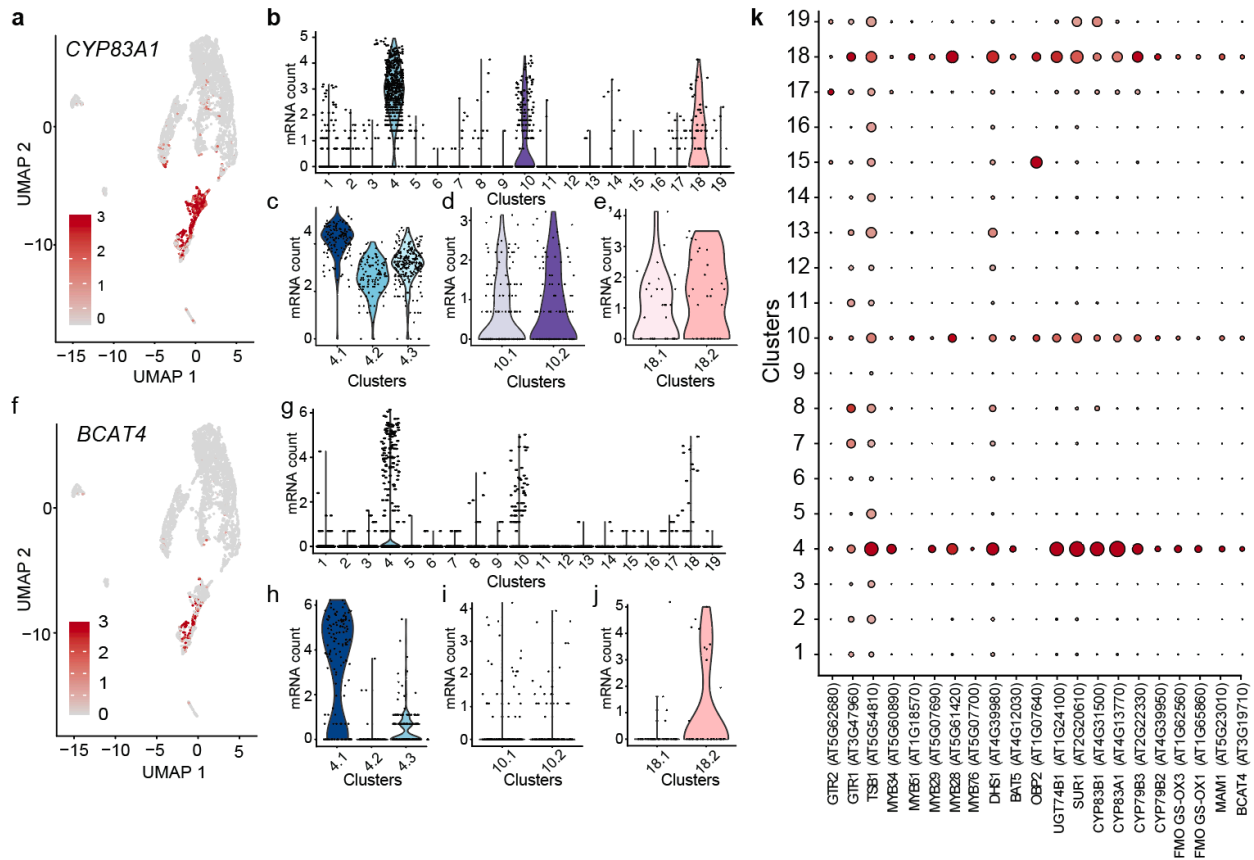

1181

1182 **Supplementary Fig. 12: Enrichment of transcripts related to glucosinolate biosynthesis and transport**

1183 **a**, UMAP showing the enrichment of *CYP83A1* transcript. **b-e**, Violin plots illustrating the transcript  
 1184 enrichment of *CYP83A1* in BS1, BS2, XP (**b,c**), PP1, PC<sup>PP</sup>, PC<sup>XP</sup> (**b,d**), PP2 and XP3 (**b,e**). **f**, UMAP showing  
 1185 the enrichment of *BCAT4* transcript. **g-j**, *BCAT4* transcript enriched in XP1, XP2 (**g,h**), PP1, PC<sup>PP</sup>, PC<sup>XP</sup> (**i**),  
 1186 and XP3 (**j**). **k**, Dot plot showing enrichment of glucosinolate-related transcripts enriched in C4, C10, and  
 1187 C18. The diameter of the dot indicates the percentage of cells within a class, while the color encodes average  
 1188 enrichment across all cells within a class. These glucosinolate-related transcripts are known to be enriched in  
 1189 the BS, according to the translome dataset<sup>85</sup>.

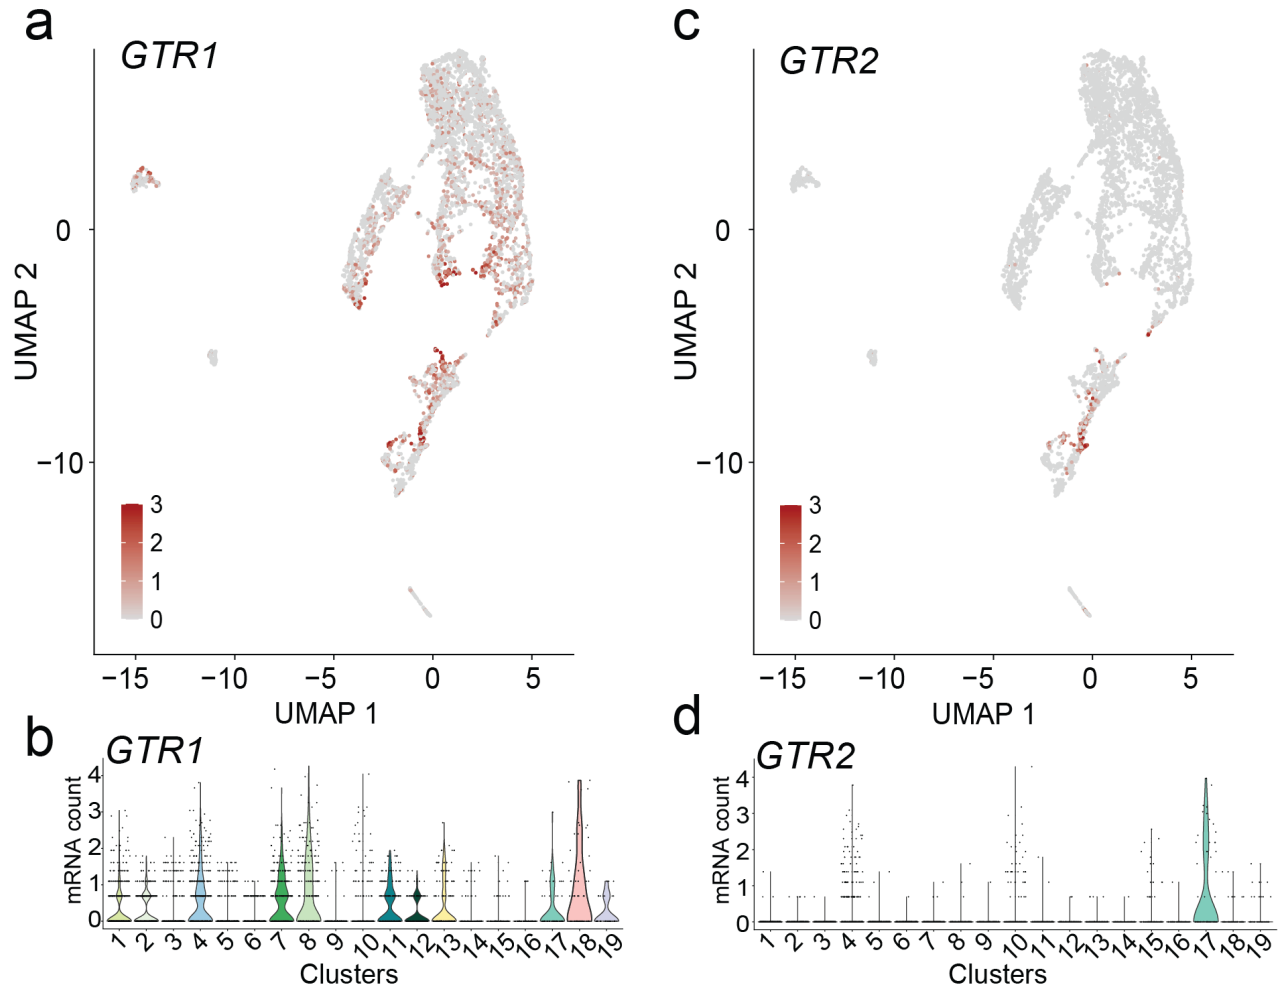

1190

1191 **Supplementary Fig. 13: Enrichment of transcripts related to glucosinolate transport.**

1192 **a,b,** *GTR1* transcript detected in the broadly across C4, C7, C8, C10, C11, C12, C13, C17, C18 and C19. **c,d,**  
1193 *GTR2* transcript enriched in C4, C10, and a putative hydathode cluster, C17. *GTR1* and *GTR2* transcripts  
1194 were not detected in phloem related clusters (CC, PP1, PP2) (**a,c**). The broad expression pattern of *GTR1*  
1195 compared to *GTR2* has been previously reported<sup>30</sup>.

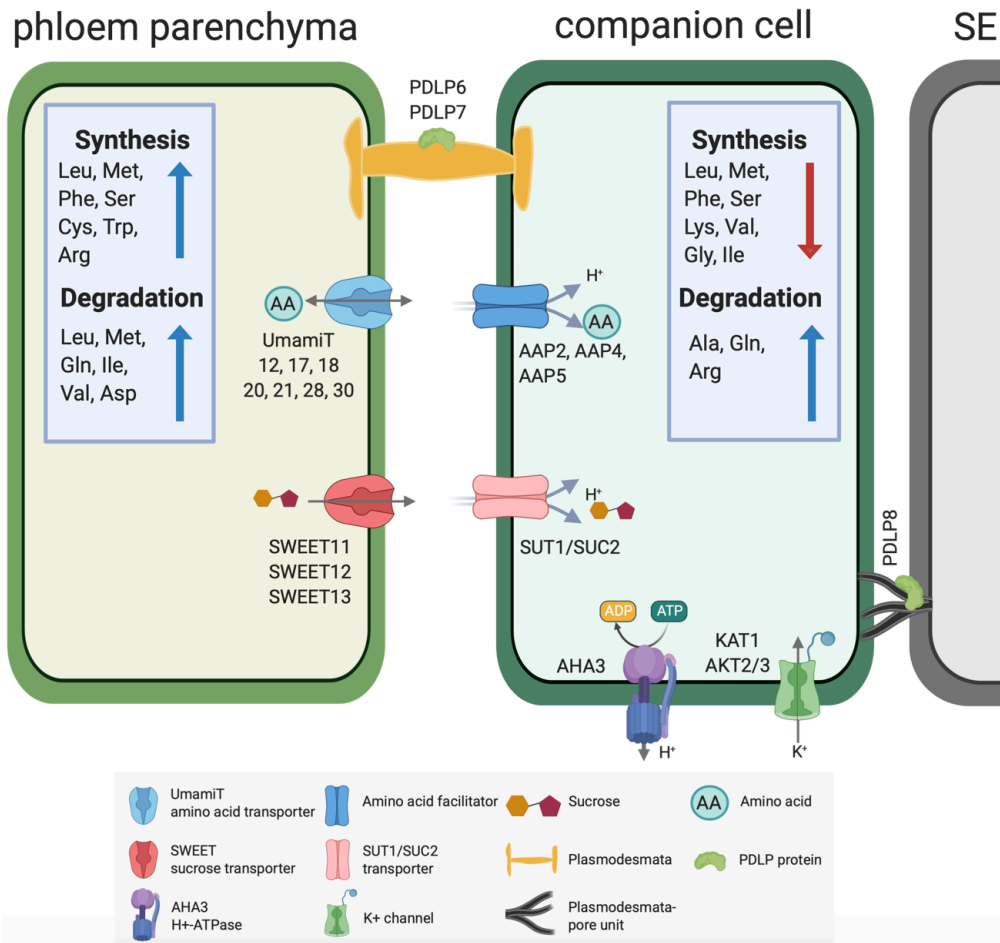

1196

1197 **Supplementary Fig. 14: Hypothetical phloem loading process in Arabidopsis leaf.**

1198 Sucrose produced during photosynthesis in the mesophyll cells is transported across the bundle sheath to the  
 1199 phloem parenchyma. Biosynthesis and catabolism of multiple amino acids is highly active in the phloem  
 1200 parenchyma. Transporters present in the phloem parenchyma secrete sucrose (SWEET11,12,13) or amino  
 1201 acids (UmamiT11, 12, 17, 18, 20, 21, 28, 30) into the apoplasm. H<sup>+</sup>/sucrose cotransporters import sucrose  
 1202 (SUT1/SUC2) and amino acids (AAP2,4,5) into the SE/CC. The H<sup>+</sup> gradient required for the active import  
 1203 of sucrose and amino acids into the SE/CC is provided by plasma membrane H<sup>+</sup>-ATPases. The membrane  
 1204 potential is maintained by the potassium channels (KAT1 and AKT2/3). Symplasmic transport is mediated  
 1205 by PDLP6 and PDLP7 in the plasmodesmata in PP cells and PDLP8 enriched in the plasmodesmata-pore unit  
 1206 of the CC. Note that the schematic is based on transcript levels and the distribution could differ at the protein  
 1207 level. Schematics was made in ©BioRender – <https://biorender.com>
